# 1 **Lapses in perceptual decisions reflect exploration**

2 Sashank Pisupati\*<sup>1,2</sup>, Lital Chartarifskey-Lynn\*<sup>1,2</sup>, Anup Khanal<sup>1</sup> & Anne K. Churchland<sup>1</sup>

3 <sup>1</sup>*Cold Spring Harbor Laboratory, Cold Spring Harbor, New York, USA*

4 <sup>2</sup>*Watson School of Biological Sciences, Cold Spring Harbor, New York, USA*

## 5 **ABSTRACT**

6 Perceptual decision-makers often display a constant rate of errors independent of evidence strength.  
7 These “lapses” are treated as a nuisance arising from noise tangential to the decision, e.g. inattention  
8 or motor errors. Here, we use a multisensory decision task in rats to demonstrate that these  
9 explanations cannot account for lapses’ stimulus dependence. We propose a novel explanation:  
10 lapses reflect a strategic trade-off between exploiting known rewarding actions and exploring  
11 uncertain ones. We tested the model’s predictions by selectively manipulating one action’s reward  
12 magnitude or probability. As uniquely predicted by this model, changes were restricted to lapses  
13 associated with that action. Finally, we show that lapses are a powerful tool for assigning decision-  
14 related computations to neural structures based on disruption experiments (here, posterior striatum  
15 and secondary motor cortex). These results suggest that lapses reflect an integral component of  
16 decision-making and are informative about action values in normal and disrupted brain states.

## 17 INTRODUCTION

18 Perceptual judgments are often modeled using noisy ideal observers (e.g., Signal detection theory,  
19 Green, Swets, et al., 1966; Bayesian decision theory, Dayan and Daw, 2008) that explain subjects'  
20 errors as a consequence of noise in sensory evidence. This predicts an error rate that decreases  
21 with increasing sensory evidence, capturing the sigmoidal relationship often seen between evidence  
22 strength and subjects' decision probabilities (i.e. the psychometric function; Fig. 1).

23 Human and non-human subjects often deviate from these predictions, displaying an additional  
24 constant rate of errors independent of the evidence strength known as “lapses”, leading to errors  
25 even on extreme stimulus levels (Wichmann and Hill, 2001; Busse et al., 2011; Gold and Ding,  
26 2013; Carandini and Churchland, 2013). Despite the knowledge that ignoring or improperly fitting  
27 lapses can lead to serious mis-estimation of psychometric parameters (Wichmann and Hill, 2001;  
28 Prins and Kingdom, 2018), the cognitive mechanisms underlying lapses remain poorly understood.  
29 A number of possible sources of noise have been proposed to explain lapses, typically tangential to  
30 the decision-making process.

31 One class of explanations for lapses relies on pre-decision noise added due to fluctuating  
32 attention, which is often operationalized as a small fraction of trials on which the subject fails to  
33 attend to the stimulus (Wichmann and Hill, 2001). On these trials, it is assumed that the subject  
34 cannot specify the stimulus (i.e. sensory noise with infinite variance, Bays, Catalao, and Husain,  
35 2009) and hence guesses randomly or in proportion to prior beliefs. This model can be thought of as  
36 a limiting case of the Variable Precision model, which assumes that fluctuating attention has a more

37 graded effect of scaling the sensory noise variance (Garrido, Dolan, and Sahani, 2011), giving rise  
38 to heavy tailed estimate distributions, resembling lapses in the limit of high variability (Shen and  
39 Ma, 2019; Zhou et al., 2018). Temporal forms of inattention have also been proposed to give rise to  
40 lapses, where the animal ignores early or late parts of the evidence (impulsive or leaky integration,  
41 Erlich et al., 2015).

42 An alternative class of explanations for lapses relies on a fixed amount of noise added after a  
43 decision has been made, commonly referred to as “post-categorization” noise (Erlich et al., 2015)  
44 or decision noise (Law and Gold, 2009). Such noise could arise from errors in motor execution  
45 (e.g. finger errors, Wichmann and Hill, 2001), non-stationarities in the decision rule arising from  
46 computational imprecision (Findling et al., 2018), suboptimal weighting of choice or outcome  
47 history (Roy et al., 2018; Busse et al., 2011) or random variability added for the purpose of  
48 exploration (eg. “ $\epsilon$ -greedy” decision rules).

49 A number of recent observations have cast doubt on fixed early- or late-stage noise as  
50 satisfactory explanations for lapses. For instance, many of these explanations predict that lapses  
51 should occur at a constant rate, while in reality, lapses are known to reduce in frequency with  
52 training in non-human primates (Law and Gold, 2009; Cloherty et al., 2019). Further, they can occur  
53 with different frequencies for different stimuli even within the same subject (in rodents, Nikbakht  
54 et al., 2018; and humans, Mihali et al., 2018; Bertolini et al., 2015; Flesch et al., 2018), suggesting  
55 that they may reflect task-specific, associative processes that can vary within a subject.

56 Lapse frequencies are even more variable across subjects and can depend on the subject’s

57 age and state of brain function. For instance, lapses are significantly higher in children and patient  
58 populations than in healthy adult humans (Roach, Edwards, and Hogben, 2004; Witton, Talcott,  
59 and Henning, 2017; Manning et al., 2018). Moreover, a number of recent studies in rodents have  
60 found that perturbing neural activity in secondary motor cortex (Erlich et al., 2015) and striatum  
61 (Yartsev et al., 2018; Guo et al., 2018) has dramatic, asymmetric effects on lapses in auditory  
62 decision-making tasks. Because these perturbations were made in structures known to be involved  
63 in action selection, an intriguing possibility is that lapses reflect an integral part of the decision-  
64 making process, rather than a peripheral source of noise. However, because these studies only tested  
65 auditory stimuli, they did not afford the opportunity to distinguish sensory modality-specific deficits  
66 from general decision-related deficits. Taken together, these observations point to the need for a  
67 deeper understanding of lapses that accounts for effects of stimulus set, learning, age and neural  
68 perturbations.

69 Here, we leverage a multisensory decision-making task in rodents to reveal the inadequacy of  
70 traditional models in accounting for the variability of lapses across stimulus conditions of varying  
71 uncertainty. We re-examine a key assumption of perceptual decision-making theories, i.e. subject's  
72 perfect knowledge of expected rewards (Dayan and Daw, 2008), to uncover a novel explanation  
73 for lapses: uncertainty-guided exploration, a well known strategy for balancing exploration and  
74 exploitation in value-based decisions. We confirm the predictions of the exploration model by  
75 manipulating the magnitude and probability of reward under conditions of varying uncertainty.  
76 Finally, we demonstrate that suppressing secondary motor cortex or posterior striatum unilaterally  
77 has an asymmetric effect on lapses that generalizes across sensory modalities, but only in uncertain

78 conditions. This can be accounted for by an action value deficit contralateral to the inactivated  
79 side, reconciling the proposed perceptual and value-related roles of these areas and suggesting  
80 that lapses are informative about the subjective values of actions, reflecting a core component of  
81 decision-making.

## 82 **RESULTS**

### 83 **Testing ideal observer predictions in perceptual decision-making**

84 We leveraged an established decision-making task (Raposo, Sheppard, et al., 2012; Raposo, Kauf-  
85 man, and Churchland, 2014; Sheppard, Raposo, and Churchland, 2013; Licata et al., 2017) in which  
86 freely moving rats judge whether the fluctuating rate of a 1000 ms series of auditory clicks and/or  
87 visual flashes (rate range: 9 - 16 Hz) is high or low compared with an abstract category boundary  
88 of 12.5Hz (Fig. 1a - c). Using Bayesian decision theory, we constructed an ideal observer for our  
89 task that selects choices that maximize expected reward (See Methods: Modelling). To test whether  
90 behavior matches ideal observer predictions, we presented multisensory trials with matched visual  
91 and auditory rates (i.e., both modalities carried the same number of events/sec; Fig. 1c, bottom)  
92 interleaved with visual-only or auditory-only trials. This allowed us to separately estimate the  
93 sensory noise in the animals' visual and auditory system, and compare the measured performance  
94 on multisensory trials to the predictions of the ideal observer.

95 Performance was assessed using a psychometric curve, i.e. the probability of high-rate  
96 decisions as a function of stimulus rate (Fig. 1f). The ideal observer model predicts a relationship

97 between the slope of the psychometric curve and noise in the animal's estimate: the higher the  
98 standard deviation ( $\sigma$ ) of sensory noise, the more uncertain the animals estimate of the rate and  
99 the shallower the psychometric curve. On multisensory trials, the ideal observer should have a  
100 more certain estimate of the rate (Fig. 1e, visual [blue] and auditory [green]  $\sigma$  values are larger  
101 than multisensory  $\sigma$  [red]), driving a steeper psychometric curve (Fig. 1f, red curve is steeper than  
102 green and blue curves). Since this model does not take lapses into account, it would predict perfect  
103 performance on the easiest stimuli regardless of uncertainty, and thus all curves should asymptote at  
104 0 and 1 (Fig 1f).

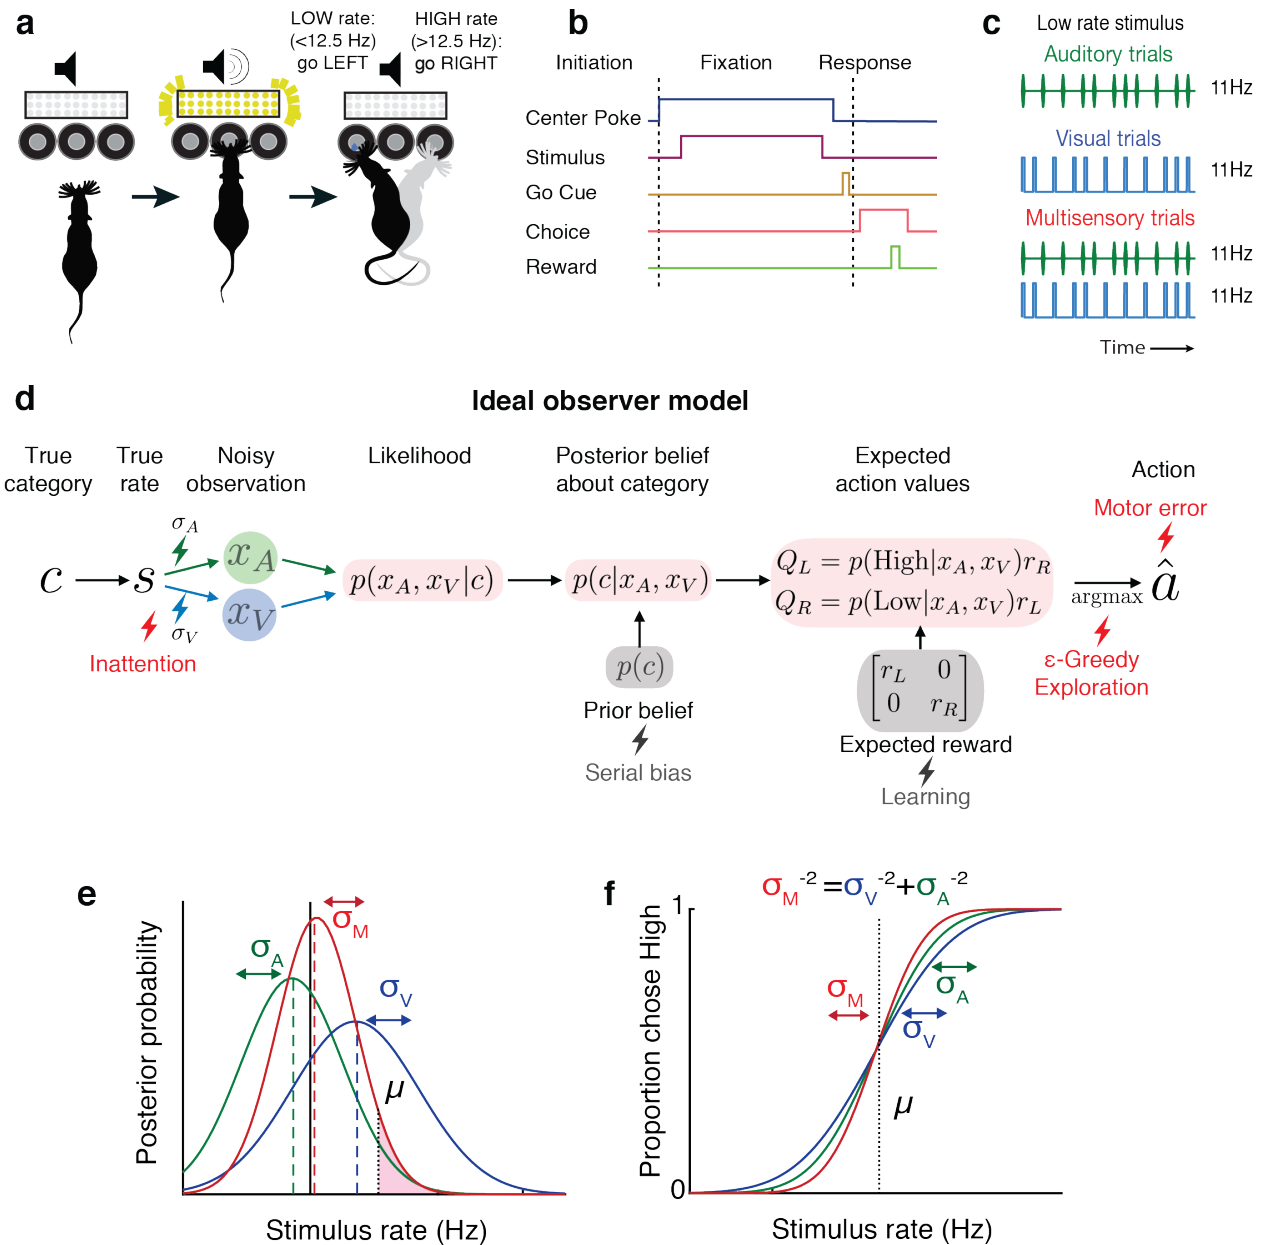

105

106 **Figure 1** Testing ideal observer predictions in perceptual decision-making. (a) Schematic drawing of

107 rate discrimination task. Rats initiate trials by poking into a center port. Trials consist of visual stimuli

108 presented via a panel of diffused LEDs, auditory stimuli presented via a centrally positioned speaker or

109 multisensory stimuli presented from both. Rats are rewarded with a  $24\mu\text{l}$  drop of water for reporting high

110 rate stimuli (greater than 12.5 Hz) with rightward choices and low rate stimuli (lower than 12.5 Hz) with

111 leftward choices. **(b)** Timeline of task events. **(c)** Example stimulus on auditory (top), visual (middle) and  
112 multisensory trials (bottom). Stimuli consist of a stream of events separated by long (100 ms) or short (50  
113 ms) intervals. Multisensory stimuli consist of visual and auditory streams carrying the same underlying  
114 rate. Visual, auditory and multisensory trials were randomly interleaved (40% visual, 40% auditory, 20%  
115 multisensory). **(d)** Schematic outlining the computations of a Bayesian ideal observer. Stimulus belonging to  
116 a true category  $c$ , with a true underlying rate  $s$  gives rise to noisy observations  $x_A$  and  $x_V$ , which are then  
117 integrated with each other and with prior beliefs to form a multisensory posterior belief about the category,  
118 and further combined with reward information to form expected action values  $Q_L, Q_R$ . The ideal observer  
119 selects the action  $\hat{a}$  with maximum expected value. Lightning bolts denote proposed sources of noise that  
120 can give rise to (red) or exacerbate (grey) lapses, causing deviations from the ideal observer. **(e)** Posterior  
121 beliefs on an example trial assuming flat priors. Solid black line denotes true rate, blue and green dotted  
122 lines denote noisy visual and auditory observations, with corresponding unisensory posteriors shown in solid  
123 blue and green. Solid red denotes the multisensory posterior, centered around the M.A.P. rate estimate in  
124 dotted red. Shaded fraction denotes the probability of the correct choice being rightward, with  $\mu$  denoting  
125 the category boundary. **(f)** Ideal observer predictions for the psychometric curve, i.e. proportion of high rate  
126 choices for each rate. Inverse slopes of the curves in each condition are reflective of the posterior widths  
127 on those conditions, assuming flat priors. The value on the abscissa corresponding to the curve's midpoint  
128 indicates the subjective category boundary, assuming equal rewards and flat priors.

### 129 **Lapses cause deviations from ideal observer, and are reduced on multisensory trials**

130 In practice, the shapes of empirically obtained psychometric curves do not perfectly match the ideal  
131 observer (Fig. 2) since they asymptote at values that are less than 1 or greater than 0. This is a



132 well known phenomenon in psychophysics (Wichmann and Hill, 2001), requiring two additional  
133 lapse parameters to precisely capture the asymptotes. To account for lapses, we fit a four-parameter  
134 psychometric function to the subjects' choice data (Fig. 2a - red, Equation 1 in Methods) with  
135 the Palamedes toolbox (Prins and Kingdom, 2018).  $\gamma$  and  $\lambda$  are the lower and upper asymptote of  
136 the psychometric function, which parameterize lapses on low and high rates respectively;  $\phi$  is a  
137 sigmoidal function, in our case the cumulative normal distribution;  $x$  is the event rate, i.e. the average  
138 number of flashes or beeps presented during the one second stimulus period;  $\mu$  parameterizes the  
139 midpoint of the psychometric function and  $\sigma$  describes the inverse slope after correcting for lapses.

140       How can we be sure that the asymptotes seen in the data truly reflect non-zero asymptotes  
141 rather than fitting artifacts or insufficient data at the asymptotes? To test whether lapses were truly  
142 necessary to explain the behavior, we fit the curves with and without lapses (Fig. 2b) and tested  
143 whether the lapse parameters were warranted. The fit without lapses was rejected in 15/17 rats by  
144 the Bayes Information Criterion (BIC), and in all rats by the Akaike Information Criterion (AIC).  
145 Fitting a fixed lapse rate across conditions was not sufficient to capture the data, nor was fitting a  
146 lapse rate that was constrained to be less than 0.1 (Wichmann and Hill, 2001). Both data pooled  
147 across subjects and individual subject data warranted fitting separate lapse rates to each condition  
148 (“free lapses” model outperforms “fixed lapses”, “restricted lapses” or “no lapses/ideal observer” in  
149 Fig. 2g).

150       Multisensory trials offer an additional, strong test of ideal observer predictions. In addition to  
151 perfect performance on the easiest stimuli, the ideal observer model predicts the minimum possible

152 uncertainty achievable on multisensory trials through optimal integration (Ernst and Bulthoff, 2004;  
153 Equation 9 in Methods). By definition, better-than-optimal performance is impossible. However,  
154 studies in humans, rodents and non-human primates performing multisensory decision-making  
155 tasks suggest that in practice, performance occasionally exceeds optimal predictions (Raposo,  
156 Sheppard, et al., 2012; Nikbakht et al., 2018; Hou et al., 2018), seeming, at first, to violate the ideal  
157 observer model. Moreover, in these datasets, performance on the easiest stimuli was not perfect  
158 and asymptotes deviated from 0 and 1. As in these previous studies, when we fit performance  
159 without lapses, multisensory performance was significantly supra-optimal ( $p=0.0012$ , paired t-test),  
160 i.e. better than the ideal observer prediction (Fig. 2c, data points are above the unity line). This  
161 was also true when lapse probabilities were assumed to be fixed across conditions ( $p=0.0018$ ) or  
162 when they were assumed to be less than 0.1 ( $p=0.0003$ ). However, when we allowed lapses to vary  
163 freely across conditions, performance was indistinguishable from optimal (Fig. 2d, data points are  
164 on the unity line). This reaffirms that proper treatment of lapses is crucial for accurate estimation of  
165 perceptual parameters and offers a potential explanation for previous reports of supra-optimality.

166 Using this improved fitting method, we replicated previous observations (Raposo, Sheppard, et  
167 al., 2012; Raposo, Kaufman, and Churchland, 2014) showing that animals have improved sensitivity  
168 (lower  $\sigma$ ) on multisensory vs. unisensory trials (Fig. 2e, red curve is steeper than green/blue curves;  
169 Fig. 2f, top). Interestingly, we observed that animals also had a lower lapse probability ( $\lambda + \gamma$ )  
170 on multisensory trials (Fig. 2e, asymptotes for red curve are closer to 0 and 1;  $n=17$  rats, 347537  
171 trials). This was consistently observed across animals (Fig. 2f bottom, the probability of lapses on  
172 multisensory trials was 0.06 on average, compared to 0.17 on visual,  $p=1.4e-4$  and 0.21 on auditory,

173  $p=1.5e-5$ ).

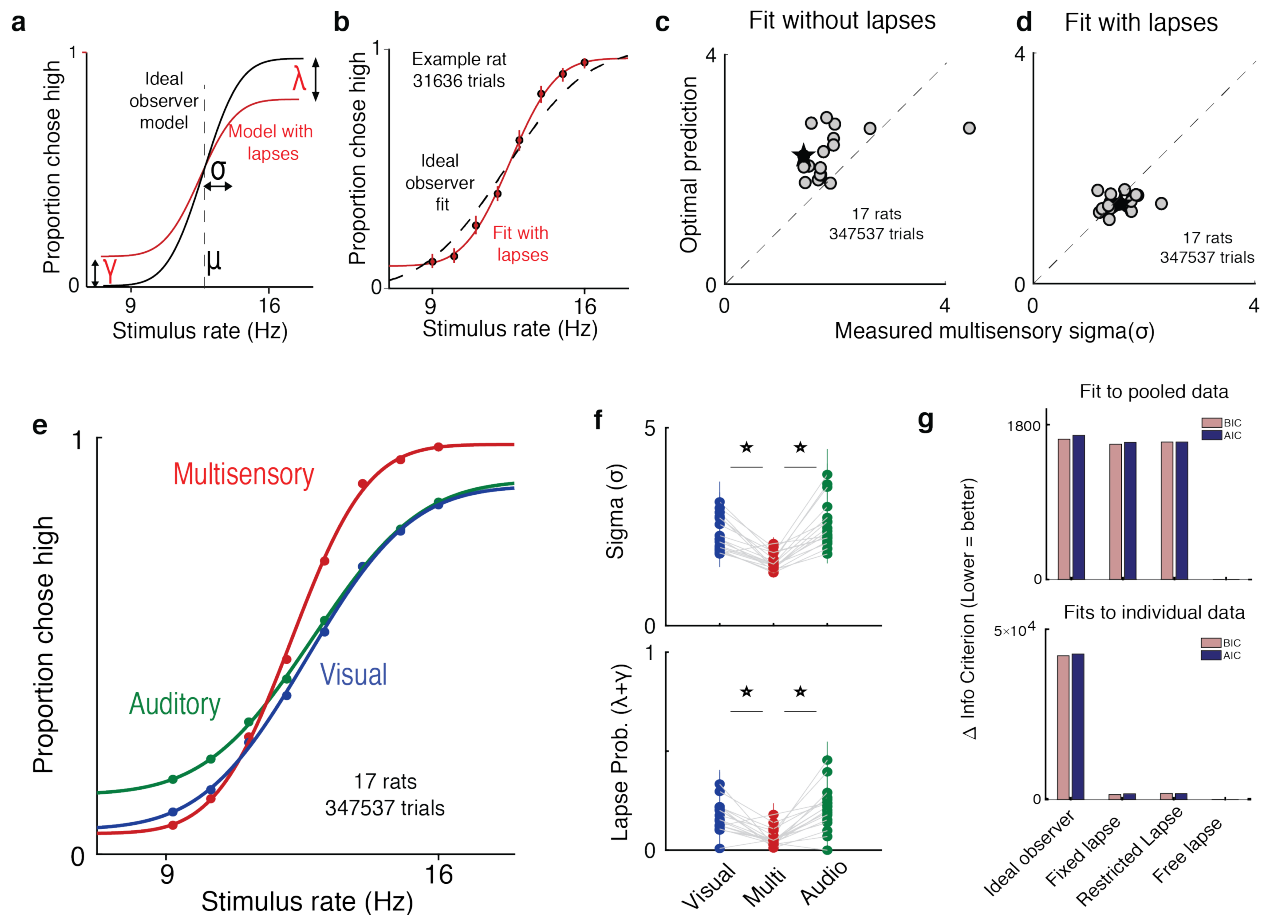

174

175 **Figure 2 Deviations from ideal observer reflect lapses in judgment.** (a) Schematic psychometric perfor-  
 176 mance of an ideal observer (black) vs. a model that includes lapses (red). The ideal observer model includes  
 177 two parameters: midpoint ( $\mu$ ) and inverse slope ( $\sigma$ ). The four-parameter model includes  $\mu$ ,  $\sigma$ , and lapse  
 178 probabilities for low rate ( $\gamma$ ) and high rate choices ( $\lambda$ ). Dotted line shows the true category boundary (12.5  
 179 Hz). (b) Subject data was fit with an ideal observer model (black) and a four-parameter model (red). (c,d)  
 180 Ideal observer predictions vs. measured multisensory sigma for fits with and without lapses. (c) Multisensory  
 181 integration seems supra-optimal when not accounting for lapses. (d) Optimal multisensory integration is  
 182 restored when accounting for lapses. (n = 17 rats. Points represent individual rats; star represents pooled data

183 across all rats. Data points that lie on the unity line represent cases in which the measured sigma was equal to  
184 the optimal prediction). **(e)** Rats' psychometric curves on auditory (green), visual (blue) and multisensory  
185 (red) trials. Points represent data pooled across 17 rats, lines represent separate four-parameter fits to each  
186 condition. **(f)** Fit values of sigma (top) and lapse parameters (bottom) on unisensory and multisensory  
187 conditions. Both parameters showed significant reduction on the multisensory conditions (paired t-test,  
188  $p < 0.05$ );  $n = 17$  rats (347537 trials). **(g)** Model comparison using BIC (pink) and AIC (blue) for fits to pooled  
189 data across subjects (top) and to individual subject data (bottom). Lower scores indicate better fits. Both  
190 metrics favor a model where lapses are allowed to vary freely across conditions ("Free lapse") over one  
191 without lapses ("Ideal observer"), one with a fixed probability of lapses ("Fixed lapse") or where the lapses  
192 are restricted to being less than 0.1 ("Restricted lapse").

193 **A novel model, uncertainty-guided exploration, explains lapses better than traditional mod-**  
194 **els of inattention or motor-error**

195 What could account for the reduction in lapse probability on multisensory trials? While adding extra  
196 parameters to the ideal observer model fit the behavioral data well and accounted for the reduction  
197 in inverse-slope on multisensory trials, this success doesn't provide an explanation for why lapses  
198 are present in the first place, nor why they differ between stimulus conditions.

199 To investigate this, we considered possible sources of noise that have traditionally been  
200 invoked to explain lapses (Fig. 1d). We first hypothesized that lapses might be due to a fixed  
201 amount of noise added once the decision has been made. These sources of noise could include  
202 decision noise due to imprecision (Findling et al., 2018) or motor errors (Wichmann and Hill, 2001).

203 However, these sources should hinder decisions equally across stimulus conditions (Supplementary  
204 Fig. 1b), which cannot explain our observation of condition-dependent lapse rates (Fig. 2f).

205 A second explanation is that lapses arise due to inattention on a small fraction of trials.  
206 Inattention would drive the animal to guess randomly, producing lapse rates whose sum should  
207 reflect the probability of not attending (Fig. 3a, Methods). According to this explanation, the lower  
208 lapse rate on multisensory trials reflects increased attention on those trials, perhaps due to their  
209 increased bottom-up salience (i.e. two streams of stimuli instead of one). To test this, we leveraged  
210 a multisensory condition that has been used to manipulate uncertainty without changing salience in  
211 rats and humans (Raposo, Sheppard, et al., 2012). Specifically, we interleaved standard matched-rate  
212 multisensory trials with “neutral” multisensory trials for which the rate of the auditory stimuli  
213 ranged between 9-16 Hz, while the visual stimuli was always 12 Hz. This rate was so close to the  
214 category boundary (12.5 Hz) that it did not provide compelling evidence for one choice or the other  
215 (Fig. 3d, left), thus reducing the information in the multisensory stimulus and increasing uncertainty.  
216 However, since both “neutral” and “matched” conditions are multisensory, they should be equally  
217 salient, and since they are interleaved, the animal would be unable to identify the condition without  
218 actually attending to the stimulus. According to the inattention model, matched and neutral trials  
219 should have the same rate of lapses, only differing in their  $\sigma$  (Supplementary Fig 1c).

220 Contrary to this prediction, we observed higher lapse rates on “neutral” trials, where the  
221 uncertainty was high, than on “matched” trials, where the uncertainty was low (Fig. 3d). The  
222 dependence of lapses on uncertainty is reminiscent of the dependence of lapses on uncertainty

223 observed when comparing unisensory vs. multisensory trials (Fig. 2e,f; Supplementary Fig. 1e).

224       Having observed that traditional explanations of lapses fail to account for the behavioral  
225 observations, we re-examined a key assumption of ideal observer models used in perceptual  
226 decision-making - that subjects have complete knowledge about the rules and rewards (Dayan and  
227 Daw, 2008). In general, this assumption may not hold true for a number of reasons - even when the  
228 stimulus category is known, subjects might have uncertainty about the values of different actions  
229 because they are still in the process of learning (Law and Gold, 2009), because they incorrectly  
230 assume that their environment is non-stationary (Yu and Cohen, 2009), or because they forget over  
231 time (Gershman, 2015; Drugowitsch and Pouget, 2018). In such situations, rather than always  
232 “exploiting” (picking the action currently assumed to have the highest value), it is advantageous to  
233 “explore” (occasionally picking actions whose value the subject is uncertain about), in order to gather  
234 more information and maximize reward in the long term (Dayan and Daw, 2008). Exploratory  
235 choices of the lower value action for the easiest stimuli would resemble lapses, and the sum of  
236 lapses would reflect the overall degree of exploration.

237       Choosing how often to explore is challenging, and requires trading off immediate rewards for  
238 potential gains in information - random exploration would reward subjects at chance, but would  
239 reduce uncertainty uniformly about the value of all possible stimulus-action pairs, while a greedy  
240 policy (i.e. always exploiting) would yield many immediate rewards while leaving lower value  
241 stimulus-action pairs highly uncertain (Supplementary Fig. 2a,b). Policies that explore randomly  
242 on a small fraction of trials (e.g. “ $\epsilon$ -Greedy” policies) do not make prescriptions about how often

243 the subject should explore, and are behaviorally indistinguishable from motor errors when the  
244 fraction is fixed (Fig. 3c). One elegant way to automatically balance exploration and exploitation  
245 is to explore more often when one is more uncertain about action values. In particular, a form of  
246 uncertainty-guided exploration called Thompson sampling is known to be asymptotically optimal in  
247 many general environments (Leike et al., 2016), and reduces to a dynamic “softmax” decision rule  
248 (Fig. 3b), whose “inverse temperature” parameter ( $\beta$ ) scales with uncertainty (Gershman, 2018).  
249 This predicts a lower  $\beta$  when values are more uncertain, encouraging more exploration and more  
250 frequent lapses, and a higher  $\beta$  when values are more certain, encouraging exploitation. The limiting  
251 case of perfect knowledge ( $\beta \rightarrow \infty$ ) reduces to the reward-maximizing ideal observer.

252 The subjects’ task is further complicated by perceptual uncertainty - on trials where the  
253 stimulus category is not fully known, credit cannot be unambiguously assigned to one stimulus-  
254 action pair when rewards are obtained (Lak et al., 2018). This predicts that conditions with higher  
255 perceptual uncertainty (e.g. unisensory or neutral trials) should have more overlapping value beliefs  
256 (Supplementary Fig. 2c), encouraging more exploration and giving rise to more frequent lapses  
257 (Supplementary Fig. 2d).

258 As a result, on multisensory neutral trials, the uncertainty-guided exploration model predicts  
259 an increase not only in the  $\sigma$  parameter, but also in lapses, just as we observed (Fig. 3d). In fact,  
260 this model predicts that both these parameters should match those on auditory trials, since these  
261 conditions have comparable levels of perceptual uncertainty. This model fit the data well (Fig. 3e,  
262 bottom). By contrast, the inattention model predicts that both conditions would have the same

263 lapse rates, with the neutral condition simply having a larger  $\sigma$ . This model provided a worse fit  
 264 to the data, particularly missing the data at extreme stimulus values where lapses are most clearly  
 265 apparent (Fig. 3e, top). Model comparison using BIC and AIC favored the exploration model over  
 266 the inattention model, both for fits to pooled data across subjects (Fig. 3f top) and fits to individual  
 267 subject data (Fig. 3f bottom, Supplementary Fig. 3)

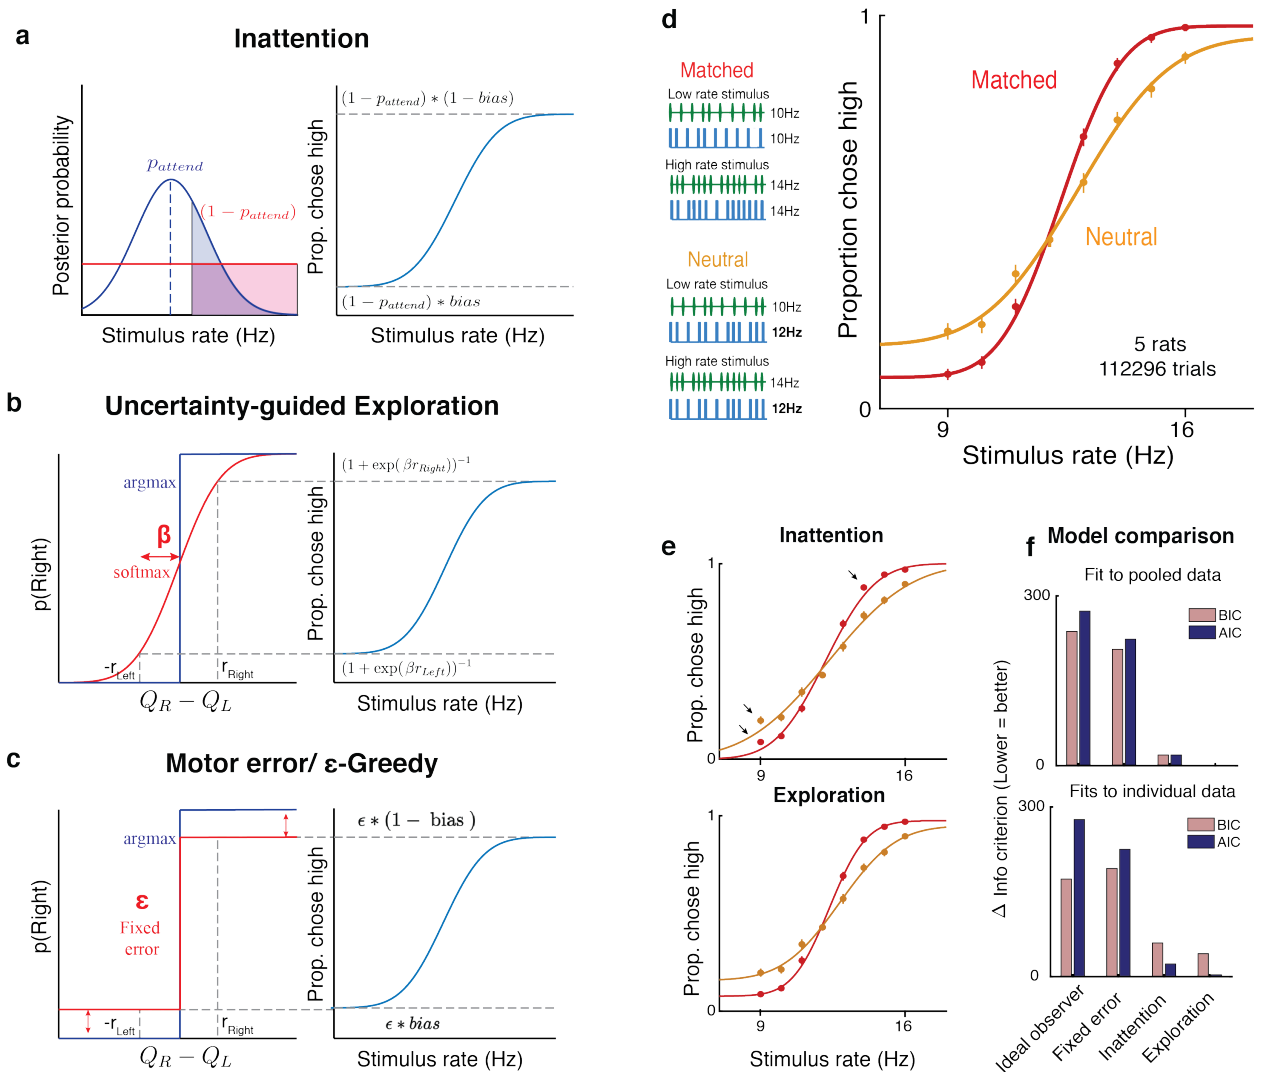

268

269 **Figure 3** Uncertainty-guided exploration offers a novel explanation for lapses. Models of lapses in  
 270 decision-making: (a) Inattention model of lapses. Left panel: on a small fraction of trials given by  $1 - p_{attend}$ ,



271 the observer does not attend to the stimulus (red curve), leading to equal posterior probabilities of high and  
272 low rates (Shaded, clear regions of curve respectively) and guesses according to the probability *bias*, giving  
273 rise to lapses (right panel). The sum of lapse rates then reflects  $1 - p_{attend}$ , while their ratio reflects the  
274 *bias*. **(b)** Uncertainty-guided exploration model. Lapses can arise from exploratory decision rules such as  
275 the “softmax” (red) rather than reward-maximization (blue). Since the difference in expected value from  
276 right and left actions ( $Q_R - Q_L$ ) is bounded by the maximum reward magnitudes  $r_{Right}$  and  $r_{Left}$ , even  
277 when the stimulus is very easy, the maximum probability of choosing the higher value option is not 1, giving  
278 rise to lapses. Lapse rates on either side are then proportional to the reward magnitude on that side, and to a  
279 “temperature” parameter  $\beta$  that depends on the uncertainty in expected reward. **(c)** Motor error, or  $\epsilon$ -greedy  
280 model. Lapses can also arise from decision rules with a fixed proportion  $\epsilon$  of random exploratory choices,  
281 or due to motor errors occurring on  $\epsilon$  fraction of trials. The sum of lapses reflects  $\epsilon$  while their ratio reflects  
282 any *bias* in exploration or motor errors. **(d)** Left: multisensory stimuli designed to distinguish between  
283 attentional and non-attentional sources of lapses. Standard multisensory stimuli with matched visual and  
284 auditory rates (top) and “neutral” stimuli where one modality has a rate very close to the category boundary  
285 and is uninformative (bottom). Both stimuli are multisensory and designed to have equal bottom-up salience,  
286 and can only be distinguished by attending to them and accumulating evidence. Right: rat performance  
287 on interleaved matched (red) and neutral (orange) trials. **(e)** Since the matched and neutral conditions are  
288 equally salient, they are expected to have equal probabilities of attending, predicting similar total lapse rates  
289 in the inattention model (top, solid lines are model fits). Deviations from model fits are denoted with arrows.  
290 The exploration model (bottom) provides a better fit, by allowing for different levels of exploration in the  
291 two conditions. **(f)** Model comparison using BIC (pink) and AIC (blue) both favor the uncertainty-guided

292 exploration model for pooled data (top) as well as individual subject data (bottom).

### 293 **Reward manipulations confirm predictions of exploration model**

294 One of the key features of the uncertainty-guided exploration model is that lapses are exploratory  
295 choices made with full knowledge of the stimulus, and should therefore depend only on the expected  
296 rewards associated with that stimulus category (Supplementary Fig. 2). This is in stark contrast to  
297 the inattention model and many other kinds of disengagement (Supplementary Fig. 4). According  
298 to these models, lapses are caused by the observer disregarding the stimulus, and hence lapses at the  
299 two extreme stimulus levels are influenced by a common underlying guessing process that depends  
300 on expected rewards from both stimulus categories. This is also in contrast to fixed motor error or  
301  $\epsilon$ -greedy models in which lapses are independent of expected reward (Fig. 3c).

302 Therefore, a unique prediction of the exploration model is that selectively manipulating  
303 expected rewards associated with one of the stimulus categories should only affect lapses at one  
304 extreme of the psychometric function. Conversely, inattention and other kinds of disengagement  
305 predict that both lapses should be affected, while fixed error models predict that neither should be  
306 affected (Fig. 4a, Supplementary Fig. 1,4).

307 To experimentally test these predictions, we tested rats on the rate discrimination task with  
308 asymmetric rewards (Fig. 4b, top). Instead of rewarding high and low rate choices equally, we  
309 increased the water amount on the reward port associated with high-rates (rightward choices) so it  
310 was 1.5 times larger than before, without changing the reward on the the low-rate side (leftward  
311 choices). In a second rat cohort we did the opposite: we devalued the choices associated with

312 high-rate trials by decreasing the water amount on that side port so it was 1.5 times smaller than  
 313 before, without changing the reward on the low-rate side.

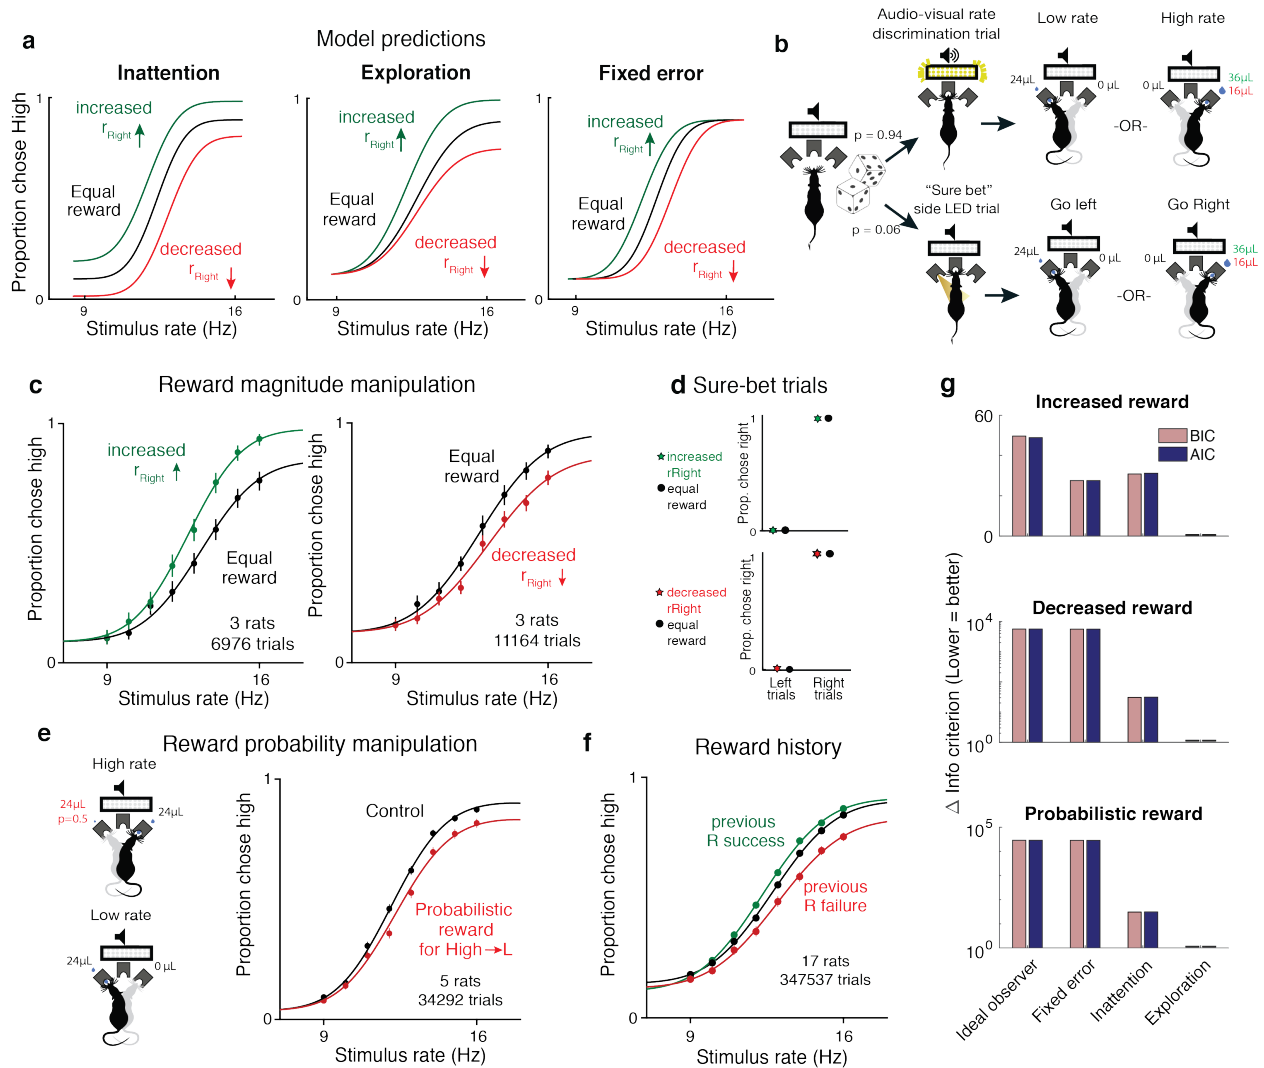

314

315 **Figure 4 Reward manipulations match predictions of the exploration model.** (a) The inattention, ex-  
 316 ploration and fixed error models make different predictions for increases and decreases in the reward  
 317 magnitude for rightward (high-rate) actions. The inattention model (left panel) predicts changes in lapses for  
 318 both high and low rate choices, while the exploration model (center panel) predicts changes in lapses only for  
 319 high rate choices, and fixed motor error or  $\epsilon$ -greedy models (right) predict changes in neither lapse. Black

320 line, equal rewards on both sides; green, increased rightward reward; red, decreased rightward reward. **(b)**  
321 Schematic of rate discrimination trials and interleaved “sure bet” trials. The majority of the trials (94%) were  
322 rate discrimination trials as described in Figure 1. On sure-bet trials, a pure tone was played during a 0.2  
323 second fixation period and one of the side ports was illuminated once the tone ended to indicate that reward  
324 was available there. Rate discrimination and sure-bet trials were randomly interleaved, as were left and right  
325 trials, and the rightward reward magnitude was either increased ( $36\mu\text{l}$ ) or decreased ( $16\mu\text{l}$ ) while maintaining  
326 the leftward reward at  $24\mu\text{l}$  **(c)** Rats’ behavior on rate discrimination trials following reward magnitude  
327 manipulations. High rate lapses decrease when water reward for high-rate choices is increased (left panel;  
328  $n=3$  rats, 6976 trials), while high-rate lapses increase when reward on that side is decreased (right panel;  
329  $n=3$  rats, 11164 trials). Solid curves are exploration model fits with a single parameter change accounting  
330 for the manipulation. **(d)** Rats show nearly perfect performance on sure-bet trials, and are unaffected by  
331 reward manipulations on these trials. **(e)** Reward probability manipulation. (Left) Schematic of probabilistic  
332 reward trials, incorrect (leftward) choices on high rates were rewarded with a probability of 0.5, and all  
333 other rewards were left unchanged. (Right) Rats’ behavior and exploration model fits showing a selective  
334 increase in high-rate lapses ( $n=5$  rats, 34292 trials). **(f)** Rats’ behavior on equal reward trials conditioned  
335 on successes (green) or failures (red) on the right on the previous trials resembles effects of reward size  
336 manipulations. **(g)** Model comparison showing that AIC and BIC both favor the exploration model on data  
337 from all 3 manipulations.

338 The animals’ behavior on the asymmetric-reward task matched the predictions of the explo-  
339 ration model. Increasing the reward size on choices associated with high-rates led to a decrease in  
340 lapses for the highest rates and no changes in lapses for the lower rates (Fig. 4c, left;  $n=3$  rats, 6976

341 trials). Decreasing the reward of choices associated with high-rates led to an increase in lapses for  
342 the highest rates and no changes in lapses for the lower rates (Fig. 4c, right; n=3 rats, 11164 trials).  
343 This shows that both increasing and decreasing the value of one of the actions has an asymmetric  
344 effect on lapse probabilities that does not match the inattention model.

345 To confirm that the asymmetric changes in lapse rate that we observed were truly driven  
346 by uncertainty, we examined performance on randomly interleaved “sure bet” trials on which the  
347 uncertainty was very low (Fig. 4b, bottom). On these trials, a pure tone was played during the  
348 fixation period, after which an LED at one of the side ports was clearly illuminated, indicating a  
349 reward. Sure-bet trials comprised 6% of the total trials, and as with the rate discrimination trials,  
350 left and right trials were interleaved. Owing to the low uncertainty, the model predicts that very  
351 little exploration would be required in this condition, and that animals would very quickly reach  
352 perfect performance on these trials. Importantly, our model predicts that performance on “sure-bet”  
353 trials would be unaffected by imbalances in reward magnitude.

354 In keeping with this prediction, performance on sure-bet trials was near perfect (rightward  
355 probabilities of 0.003 [0.001,0.01] and 0.989 [0.978,0.995] on go-left and go-right trials respec-  
356 tively), and unaffected following reward manipulations (Fig. 4d: Rightward probabilities of  
357 0.004 [0.001, 0.014] and 0.996 [0.986,0.999] on increased reward, 0.006 [0.003,0.012] and 0.99  
358 [0.983,0.994] on decreased reward). This suggests that the effect of action value on lapses is  
359 restricted to uncertain situations that encourage subjects to explore, rather than exploit.

360 As an additional test of the model, we manipulated expected rewards by probabilistically

361 rewarding incorrect choices. Here, leftward choices on high rate (“go right”) trials were rewarded  
362 with a probability of 0.5, while leaving all other rewards unchanged (Fig. 4e left). The exploration  
363 model predicts that this should selectively increase the value of leftward actions on high rate trials,  
364 increasing lapses on high rates. Indeed, this is what we observed (Fig. 4e right, n=5 animals,  
365 347537 trials), and the effect was strikingly similar to the decreased reward experiment, even though  
366 the two manipulations affect high rate action values through changes on opposite reward ports.  
367 Moreover, this suggests that lapses reflect changes in action value caused by changing either reward  
368 magnitudes or reward probabilities, as one would expect from the exploration model.

369 An added consequence of uncertainty in action values is that it should encourage continued  
370 learning even in the absence of explicit reward manipulations. This means that animals should  
371 continue to use the outcomes of previous trials to update the values of different actions as long as  
372 this uncertainty persists. Such persistent learning has been observed in a number of studies (Busse  
373 et al., 2011; Lak et al., 2018; Mendonca et al., 2018; Odoemene et al., 2018; Pinto et al., 2018;  
374 Scott et al., 2015). The uncertainty-dependent exploration model predicts that changes in action  
375 values should manifest as changes in lapse rates. For example, action value of rightward choices  
376 should increase following a rightward success and decrease following a rightward failure. This  
377 predicts similar changes in lapses as reward magnitude manipulations. As predicted, trials following  
378 rewarded and unrewarded rightward choices showed decreased and increased lapses, respectively  
379 (Fig. 4f; same rats and trials as in Fig. 2e). Taken together, manipulations of value confirm the  
380 predictions of the uncertainty-dependent exploration model (Fig. 4g).

381 **Lapses are a powerful tool for assigning decision-related computations to neural structures**  
382 **based on disruption experiments**

383 The results of the behavioral manipulations (above) predict that unilateral disruption of areas  
384 that compute action values should affect lapse rates asymmetrically. In contrast, disruptions to  
385 areas that process sensory evidence would lead to horizontal biases without affecting lapses, and  
386 disruptions to motor areas that make one of the actions harder to perform would affect both lapses  
387 (Supplementary Fig. 5a). Crucially, in the absence of lapses, all three of these disruptions would  
388 drive an identical behavioral effect, a horizontal shift of the psychometric function (Supplementary  
389 Fig. 5b). This suggests that lapses can be used as a tool to determine which computations are  
390 affected by disruptions of a candidate brain region. To demonstrate this, we identified two candidate  
391 areas, secondary motor cortex (M2) and posterior striatum (pStr), that receive convergent input from  
392 primary visual and auditory cortices (Supplementary Fig. 6, results of simultaneous anterograde  
393 tracing from V1 and A1; also see Jiang and Kim, 2018; Barthas and Kwan, 2017). In previous  
394 work, disruptions of these areas had effects on auditory decisions, including changes in lapses  
395 (Erlich et al., 2015; Guo et al., 2018). However, considerable controversy remains as to which  
396 computations were affected by those disruptions. The effects were largely interpreted in terms  
397 of traditional ideal observer models, and thus attributed to perceptual biases (Guo et al., 2018),  
398 leaky accumulation (Erlich et al., 2015) or post categorization biases (Piet et al., 2017; Erlich et al.,  
399 2015). However, the asymmetric effects on lapses seen in these studies resembled the effects of the  
400 reward manipulations in our task, hinting that they may actually arise from action value changes.  
401 Importantly, these existing studies used only auditory stimuli, so were limited in their ability to

402 distinguish sensory-specific deficits from action value deficits.

403 Here, we used analyses of lapses to determine the decision-related computations altered by  
404 unilateral disruption of M2 and pStr. If these disruptions affected action values, the exploration  
405 model makes three strong predictions. First, because action values are computed late in the decision-  
406 process, the model predicts that the effects should not depend on the modality of the stimulus. We  
407 therefore performed disruptions in animals doing interleaved auditory, visual and multisensory  
408 trials. If pStr and M2 indeed compute action value, then following unilateral disruption of these  
409 areas, our model should capture changes to all three modalities by a single parameter change to  
410 the contralateral action value. Second, these disruptions should selectively affect lapses on stimuli  
411 associated with contralateral actions, irrespective of the stimulus-response contingency. To test  
412 this, we performed disruptions on animals trained on standard and reversed contingencies. Finally,  
413 because altered action values should have no effect when there is no uncertainty and consequently  
414 no exploration, disruption to pStr and M2 should spare performance on sure-bet trials (Fig. 4b,  
415 bottom).

416 We suppressed activity of neurons in each of these areas using muscimol, a  $GABA_A$  agonist,  
417 during our multisensory rate discrimination task. We implanted bilateral cannulae in M2 (Fig.  
418 5a, Supplementary Fig. 7b;  $n = 5$  rats; +2 mm AP 1.3 mm ML, 0.3 mm DV) and pStr (Fig. 5a,  
419 Supplementary Fig. 7a;  $n = 6$  rats; -3.2 mm AP, 5.4 mm ML, 4.1 mm DV). On control days, rats were  
420 infused unilaterally with saline, followed by unilateral muscimol infusion the next day (M2: 0.1-0.5  
421  $\mu\text{g}$ , pStr 0.075-0.125  $\mu\text{g}$ ). We compared performance on the multisensory rate discrimination task



422 for muscimol days with preceding saline days. Inactivation of the side associated with low-rate  
423 choices biased the animals to make more low-rate choices (Fig. 5b; left 6 panels: empty circles,  
424 inactivation sessions; full circles, control sessions), while inactivation of the side associated with  
425 high-rates biased them to make more high-rate choices (Fig. 5b, right 6 panels). The inactivations  
426 largely affected lapses on the stimulus rates associated with contralateral actions, while sparing  
427 those associated with ipsilateral actions (Fig. 5c). These results recapitulated previous findings,  
428 and were strikingly similar to the effects we observed following reward manipulations (as seen in  
429 Fig. 4c, right panel). These effects were seen across areas (Fig. 5b, top, M2; bottom, pStr) and  
430 modalities (Fig. 5b; green, auditory; blue, visual and red, multisensory).

431 Fitting the data with the exploration model revealed that, in keeping with the first model  
432 prediction, the effects on lapses in all modalities could be captured by scaling the contralateral action  
433 value by a single parameter (Fig. 5b, joint fits to control [solid lines] and inactivation trials [dotted  
434 lines] across modalities, differing only by a single parameter), similar to the reward manipulation  
435 experiments. Animals that were inactivated on the side associated with high rates showed increased  
436 lapses on low-rate trials (Fig. 5c, bottom right; data points are above the unity line; n=9 rats), but  
437 unchanged lapses on high-rate trials (Fig. 5c, top right; data points are on the unity line). This was  
438 consistent across areas and modalities (Fig. 5c; M2, triangles; pStr, circles; blue, visual; green,  
439 auditory; red, multisensory). Similarly, animals that were inactivated on the side associated with  
440 low rates showed the opposite effect: increased lapses on high-rate trials (Fig. 5c, top left; n=10  
441 rats), while lapses did not change for low-rate trials (Fig. 5c bottom left). The effect was consistent  
442 across individual animals (M2, Supplementary Fig. 8; pStr, Supplementary Fig. 9).

443 In keeping with the second prediction, when we compared the effects of the disruptions  
444 in animals trained on standard and reversed contingencies (low rates rewarded with leftward or  
445 rightward actions respectively), the effects were always restricted to lapses on the stimuli associated  
446 with the side contralateral to the inactivation (Supplementary Fig. 10), always resembling a  
447 devaluation of contralateral actions (Supplementary Fig. 11).

448 A model comparison revealed that a fixed reduction in contralateral value captured the  
449 inactivation effects much better than a fixed reduction in contralateral sensory evidence or a fixed  
450 increase in contralateral motor effort, both for M2 (Fig. 5e top) and pStr (Fig. 5e bottom). In  
451 uncertain conditions, this reduced contralateral value gives rise to more exploratory choices and  
452 hence more lapses on one side (Fig. 5f top).

453 The final prediction of the exploration model is that changes in action value will only affect  
454 trials in which there was uncertainty about the outcome. In keeping with that prediction, performance  
455 was spared on sure-bet trials (Fig. 5d): rats made correct rightward and leftward choices regardless  
456 of the side that was inactivated. This observation provides further reassurance that the changes  
457 we observed on more uncertain conditions did not simply reflect motor impairments that drove a  
458 tendency to favor ipsilateral movements. Additional movement parameters such as wait time in the  
459 center port and movement times to ipsilateral and contralateral reward ports were likewise largely  
460 spared (Supplementary figure 12), suggesting that effects on decision outcome were not due to an  
461 inactivation-induced motor impairment.

462 Together, these results demonstrate that lapses are a powerful tool for interpreting behavioral

463 changes in disruption experiments. For M2 and pStr disruptions, our analysis of lapses and  
 464 deployment of the exploration model allowed us to reconcile previous inactivation studies. Our  
 465 results suggest that M2 and pStr have a lateralized, modality-independent role in computing the  
 466 expected value of actions (Fig. 5f bottom).

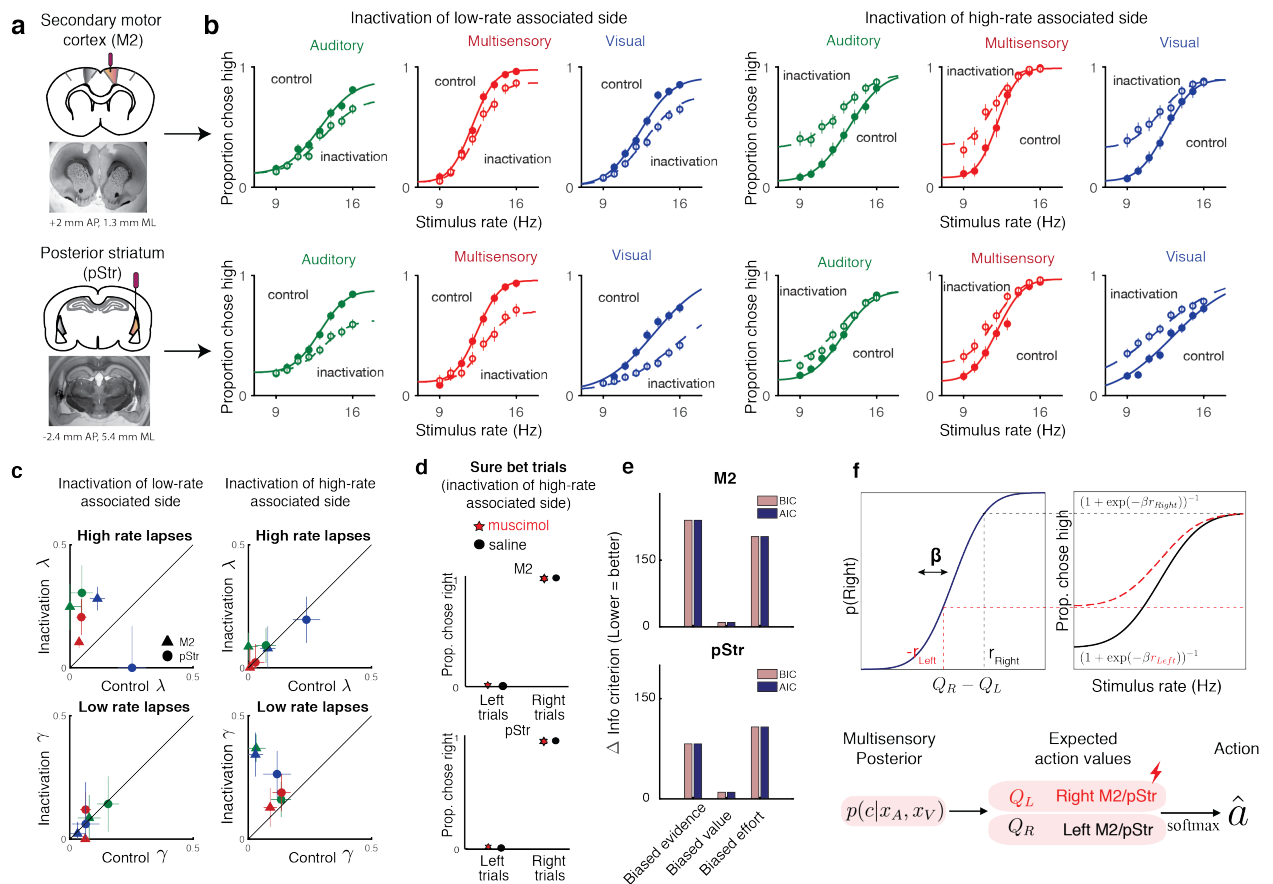

467

468 **Figure 5 Inactivation of secondary motor cortex and posterior striatum affects lapses, suggesting a**  
 469 **role in action value encoding.** (a) Schematic of cannulae implants in M2 (top) and pStr (bottom) and  
 470 representative coronal slices. For illustration purposes only, the schematic shows implants in the right  
 471 hemisphere, however, the inactivations shown in panel (b) were performed unilaterally on both hemispheres.  
 472 (b) Unilateral inactivation of M2 (top) and pStr (bottom). Left 6 plots: inactivation of the side associated

473 with low-rates shows increased lapses for high rates on visual (blue), auditory (green) and multisensory  
474 (red) trials (M2: n=5 rats; 10329 control trials, full line; 6174 inactivation trials, dotted line; pStr: n=5  
475 rats; 10419 control trials; 6079 inactivation trials). Right 6 plots: inactivation of the side associated with  
476 high-rates shows increased lapses for low rates on visual, auditory and multisensory trials (M2: n=3 rats;  
477 5678 control trials; 3816 inactivation trials; pStr: n=6 rats; 11333 control trials; 6838 inactivation trials).  
478 Solid lines are exploration model fits, accounting for inactivation effects across all 3 modalities by scaling all  
479 contralateral values by a single parameter. **(c)** Increased high rate lapses following unilateral inactivation of  
480 the side associated with low-rates (top left); no change in low rate lapses (bottom left) and vice versa for  
481 inactivation of the side associated with high-rates (top, bottom right). Control data on the abscissa is plotted  
482 against inactivation data on the ordinate. Same animals as in **b**. Green, auditory trials; blue, visual trials; red,  
483 multisensory trials. Abbreviations: posterior striatum (pStr), secondary motor cortex (M2). **(d)** Sure bet trials  
484 are unaffected following inactivation. Pooled data shows that rats that were inactivated on the side associated  
485 with high rates make near perfect rightward and leftward choices Top, M2 (3 rats); bottom, pStr (6 rats). **(e)**  
486 Model comparison of three possible multisensory deficits - reduction of contralateral evidence by a fixed  
487 amount (left), reduction of contralateral value by a fixed amount (center) or an increased contralateral effort  
488 by a fixed amount (right). Both AIC and BIC suggest a value deficit **(f)** Proposed computational role of M2  
489 and Striatum. Lateralized encoding of left and right action values by right and left M2/pStr (bottom) explains  
490 the asymmetric effect of unilateral inactivations on lapses (top).

## 491 **DISCUSSION**

492 Perceptual decision-makers have long been known to display a small fraction of errors even on easy  
493 trials. Until now, these “lapses” were largely regarded as a nuisance and lacked a comprehensive,  
494 normative explanation. Here, we propose a novel explanation for lapses: that they reflect a strategic  
495 balance between exploiting known rewarding options and exploring uncertain ones. Our model  
496 makes strong predictions for lapses under diverse decision-making contexts, which we have tested  
497 here. First, the model predicts more lapses on conditions with higher uncertainty, such as unisensory  
498 (Fig. 2) or neutral (Fig. 3), compared to multisensory or sure-bet conditions. Second, the model  
499 predicts that asymmetric reward manipulations should only affect lapses on one side, sparing  
500 decisions to the other side as well as sure-bet trials (Fig. 4). Finally, the model predicts that lapses  
501 should be affected by perturbations to brain regions that encode action value. Accordingly, we  
502 observed that unilateral inactivations of secondary motor cortex and posterior striatum similarly  
503 affected lapses on one side across auditory, visual and multisensory trials (Fig. 5). Taken together,  
504 our model and experimental data argue strongly that far from being a nuisance, lapses are informative  
505 about animals’ subjective action values and reflect a trade-off between exploration and exploitation.

506       Considerations of value have provided many useful insights into aspects of behavior that  
507 seem sub-optimal at first glance from the perspective of perceptual ideal observers. For instance,  
508 many perceptual tasks are designed with accuracy in mind - defining an ideal observer as one  
509 who maximizes accuracy, in line with classical signal detection theory. However, in practice, the  
510 success or failure of different actions may be of unequal value to subjects, especially if reward or

511 punishment is delivered explicitly, as is often the case with non-human subjects. This may give rise  
512 to biases that can only be explained by an observer that maximizes expected utility (Dayan and Daw,  
513 2008). Similarly, outcomes on a given trial can influence decisions about stimuli on subsequent  
514 trials through reinforcement learning, giving rise to serial biases. These biases occur even though  
515 the ideal observer should treat the evidence on successive trials as independent (Busse et al., 2011;  
516 Lak et al., 2018; Mendonca et al., 2018). When subjects can control how long they sample the  
517 stimulus, subjects maximizing reward rate may choose to make premature decisions, sacrificing  
518 accuracy for speed (Bogacz et al., 2006; Drugowitsch, DeAngelis, et al., 2014). Finally, additional  
519 costs of exercising mental effort could lead to bounded optimality through “satisficing” or finding  
520 good enough solutions (Mastrogiorgio and Petracca, 2018; Fan, Gold, and Ding, 2018).

521 Here, we take further inspiration from considerations of value to provide a novel, normative  
522 explanation for lapses in perceptual decisions. Our results argue that lapses are not simply accidental  
523 errors made as a consequence of attentional “blinks” or motor “slips”, but can reflect a deliberate,  
524 internal source of behavioral variability that facilitates learning and information gathering when  
525 the values of different actions are uncertain. This explanation connects a well known strategy  
526 in value-based decision making to a previously mysterious phenomenon in perceptual decision  
527 making.

528 Although exploration no longer yields the maximum utility on any given trial, it is critical  
529 for dynamic environments, and those in which there is uncertainty about probability of reward or  
530 stimulus-response contingency, especially if these need to be learnt or refined through experience.

531 By encouraging subjects to sample multiple options, exploration can potentially improve subjects'  
532 knowledge of the rules of the task, helping them to increase future payoff, thus maximizing expected  
533 utility over a long period of time. This offers an explanation for the higher rate of lapses seen in  
534 humans on tasks with abstract (Raposo, Sheppard, et al., 2012), non-intuitive (Mihali et al., 2018)  
535 or non-verbalizable (Flesch et al., 2018) stimulus-response contingencies.

536         Balancing exploration and exploitation is computationally challenging, and the mechanism  
537 we propose here, Thompson sampling, is an elegant heuristic for achieving this balance. This  
538 strategy has been shown to be asymptotically optimal in partially observable environments (Leike  
539 et al., 2016) and can be naturally implemented through a sampling scheme where the subject  
540 samples action values from a learnt distribution and then maximizes with respect to the sample  
541 (Gershman, 2018). This strategy predicts that conditions with higher uncertainty should have higher  
542 exploration, and consequently higher lapse rates, explaining the pattern of lapse rates we observed  
543 on unisensory vs. multisensory trials as well as on neutral vs. matched trials. A lower rate of lapses  
544 on multisensory trials has also been reported on a visual-tactile task in rats (Nikbakht et al., 2018)  
545 and a vestibular integration task in humans (Bertolini et al., 2015) and can potentially account for  
546 the apparent supra-optimal integration that has been reported in a number of rodent, non-human  
547 primate and human studies (Nikbakht et al., 2018; Hou et al., 2018; Raposo, Sheppard, et al., 2012).  
548 A strong prediction of uncertainty guided exploration is that the animal should quickly learn to  
549 exploit on conditions with no uncertainty, as we observed on sure-bet trials (Fig. 4d, 5d).

550         Uncertainty-guided exploration also predicts that exploratory choices, and consequently

551 lapses, should decrease with training as the animal becomes more certain of the rules and expected  
552 rewards, explaining training-dependent effects reported in primates (Law and Gold, 2009; Cloherty  
553 et al., 2019). This can also potentially explain why children have higher lapse rates (Witton, Talcott,  
554 and Henning, 2017; Manning et al., 2018)- they have been shown to be more exploratory in their  
555 decisions than adults (Lucas et al., 2014).

556 A unique prediction of the exploration model is that it predicts lapse rates will sometimes  
557 change asymmetrically for left and right decisions. For instance, changing the value associated  
558 with one of the decisions (eg. high rate) should only affect lapses associated with that decision -  
559 predicting more lapses on high rates if the rightward reward is decreased or if leftward decisions are  
560 probabilistically rewarded on high rates. Similarly, increasing rightward rewards should decrease  
561 lapses on high rates. These predictions are borne out (Fig. 4c), and rightward successes or failures  
562 on the previous trial have a similar effect. The model also suggests that the asymmetric effects on  
563 lapses seen during unilateral inactivations of prefrontal and striatal regions (Fig. 5b) arise from a  
564 selective devaluation of contralateral actions. This interpretation reconciles a number of studies that  
565 have found asymmetric effects of inactivating these areas during perceptual decisions (Erlich et al.,  
566 2015; Zatka-Haas et al., 2019; Wang et al., 2018; Guo et al., 2018) with their established roles in  
567 encoding action value (Barthas and Kwan, 2017; Lee et al., 2015) during value-based decisions.

568 An open question that remains is how the brain might tune the degree of exploration in  
569 proportion to uncertainty. An intriguing candidate for this is dopamine, whose phasic responses have  
570 been shown to reflect state uncertainty (Starkweather et al., 2017; Babayan, Uchida, and Gershman,



2018; Lak et al., 2018), and whose tonic levels have been shown to modulate exploration in mice on a lever-press task (Beeler et al., 2010), and context-dependent song variability in songbirds (Leblois, Wendel, and Perkel, 2010). Dopaminergic genes have been shown to predict individual differences in uncertainty-guided exploration in humans (Frank et al., 2009), and dopaminergic disorders such as Parkinson's disease have been shown to disrupt the uncertainty-dependence of lapses across conditions on a multisensory task (Bertolini et al., 2015). Patients with ADHD, another disorder associated with dopaminergic dysfunction, have been shown to display both increased perceptual variability and increased task-irrelevant motor output, a measure that correlates with lapses (Mihali et al., 2018). A promising avenue for future studies is to leverage the informativeness of lapses and the precise control of uncertainty afforded by multisensory tasks, in conjunction with perturbations or recordings of dopaminergic circuitry, to further elucidate the connections between perceptual and value-based decision making systems.

## **METHODS**

### **Behavior**

***Animal Subjects and Housing*** All animal procedures and experiments were in accordance with the National Institutes of Health's Guide for the Care and Use of Laboratory Animals and were approved by the Cold Spring Harbor Laboratory Animal Care and Use Committee. Experiments were conducted with 34 adult male and female Long Evans rats (250-350g, Taconic Farms) that were housed with free access to food and restricted access to water starting from the onset of behavioral training. Rats were housed on a reversed light-dark cycle; experiments were run during

591 the dark part of the cycle. Rats were pair-housed during the whole training period.

592 ***Animal training and behavioral task*** Rats were trained following previously established methods  
593 (Raposo 2012, Sheppard 2013, Raposo 2014, Licata 2017). Briefly, rats were trained to wait in  
594 the center port for 1000 ms while stimuli were presented, and to associate stimuli with left/right  
595 reward ports. Stimuli for each trial consisted of a series of events: auditory clicks from a centrally  
596 positioned speaker, full-field visual flashes, or both together. Stimulus events were separated by  
597 either long (100 ms) or short (50 ms) intervals. For the easiest trials, all inter-event intervals were  
598 identical, generating rates that were 9 events/s (all long intervals) or 16 events/s (all short intervals).  
599 More difficult trials included a mixture of long and short intervals, generating stimulus rates that  
600 were intermediate between the two extremes and therefore more difficult for the animal to judge.  
601 The stimulus began after a variable delay following when the rats snout broke the infrared beam  
602 in the center port. The length of this delay was selected from a truncated exponential distribution  
603 ( $\lambda = 30$  ms, minimum = 10 ms, maximum = 200 ms) to generate an approximately flat hazard  
604 function. The total time of the stimulus was usually 1000 ms. Trials of all modalities and stimulus  
605 strengths were interleaved. For multisensory trials, the same number of auditory and visual events  
606 were presented (except for a subset of neutral trials). Auditory and visual stimulus event times were  
607 generated independently, as our previous work has demonstrated that rats make nearly identical  
608 decisions regardless of whether stimulus events are presented synchronously or independently  
609 (Raposo, Sheppard, et al., 2012). For most experiments, rats were rewarded with a drop of water  
610 for moving to the left reward port following low-rate trials and to the right reward port following  
611 high rate trials. For muscimol inactivation experiments half of the rats were rewarded according

612 to the reverse contingency. Animals typically completed between 700 and 1,200 trials per day.  
613 Most experiments had 18 conditions (3 modalities, 8 stimulus strengths), leading to 29-50 trials per  
614 condition per day.

615 To probe the effect of uncertainty on lapses, rats received catch trials consisting of multisensory  
616 neutral trials, where only the auditory modality provided evidence for a particular choice, whereas  
617 the visual modality provided evidence that was so close to the category boundary (12 Hz) that it did  
618 not support one choice or the other (Raposo, Sheppard, et al., 2012)

619 To probe the effect of value on lapses, we manipulated either reward magnitude or reward  
620 probability associated with high rates, while keeping low rate trials unchanged. To increase or  
621 decrease reward magnitude associated with high rates, the amount of water dispensed on the right  
622 port was increased or decreased to 36 $\mu$ l or 16 $\mu$ l respectively, while the reward on the left port  
623 was maintained at 24  $\mu$ l. To manipulate reward probability, we occasionally rewarded rats on the  
624 (incorrect) left port on high rate trials with a probability of 0.5. The right port was still rewarded  
625 with a probability of 1 on high rates, and reward probabilities on low rate trials were unchanged (1  
626 on the left port, 0 on the right).

## 627 **Analysis of behavioral data.**

628 **Psychometric curves.** Descriptive four-parameter psychometric functions were fit to choice data us-  
629 ing the Palamedes toolbox (Prins and Kingdom, 2018). Psychometric functions were parameterized  
630 as:

$$\psi(x; \mu, \sigma, \gamma, \lambda) = \phi(x; \mu, \sigma)(1 - \lambda - \gamma) + \gamma \quad (1)$$

631 where  $\gamma$  and  $\lambda$  are the lower and upper asymptote of the psychometric function, which parametrize  
632 the lapse rates on low and high rates, respectively.  $\phi$  is a cumulative normal function;  $x$  is the  
633 event rate, i.e. the number of flashes or beeps presented during the one second stimulus period;  $\mu$   
634 parametrizes the  $x$ -value at the midpoint of the psychometric function and  $\sigma$  describes the inverse  
635 slope. 95% Confidence intervals on these parameters were generated via bootstrapping based on  
636 1000 simulations.

637 Our definition of lapses is restricted to strictly *asymptotic* errors following Wichmann and  
638 Hill, 2001, and not simply errors on the easiest stimuli tested. Errors on the easiest stimuli could in  
639 general arise not just from lapses (strictly defined) but also from perceptual errors caused by low  
640 sensitivity to the stimulus, an insufficient stimulus range or non-stationary weights (Busse et al.,  
641 2011; Roy et al., 2018). However we do not consider easy errors alone to be evidence of lapses and  
642 only consider asymptotic errors. To confirm the necessity of including the lapse parameters, we fit  
643 variants of the model above where the lapse parameters are restricted to be zero, and only included  
644 them when warranted by model comparison using AIC/BIC.

## 645 **Modeling**

### 646 *Ideal observer model*

647 We can specify an ideal observer model for our task using Bayesian Decision Theory (Dayan and  
648 Daw, 2008). This observer maintains probability distributions over previously experienced stimuli  
649 and choices, computes the posterior probability of each action being correct given its observations  
650 and picks the action that yields the highest expected reward.

651 Let the true category on any given trial be  $c_{true}$ , the true stimulus rate be  $s_{true}$  and the animal's  
 652 noisy visual and auditory observations of  $s_{true}$  be  $x_V$  and  $x_A$ , respectively. We assume that the two  
 653 sensory channels are corrupted by independent gaussian noise with standard deviation  $\sigma_A$  and  $\sigma_V$ ,  
 654 respectively, giving rise to conditionally independent observations.

$$p(x_A|s_{true}) = \mathcal{N}(s_{true}, \sigma_A), \quad p(x_V|s_{true}) = \mathcal{N}(s_{true}, \sigma_V), \quad (2)$$

$$p(x_A, x_V|s_{true}) = p(x_A|s_{true})p(x_V|s_{true})$$

655 The ideal observer can use this knowledge to compute the likelihood of seeing the current trial's  
 656 observations as a function of the hypothesized stimulus rate  $s$ . This likelihood  $\mathcal{L}$  is a gaussian  
 657 function of  $s$  with a mean given by a weighted sum of the observations  $x_A$  and  $x_V$ ,:

$$\begin{aligned} \mathcal{L}(s) &= p(x_A, x_V|s) = p(x_A|s)p(x_V|s) \\ &\propto \mathcal{N}(\mu_M, \sigma_M) \\ \mu_M &= w_A x_A + w_V x_V \\ \sigma_M &= (\sigma_A^{-2} + \sigma_V^{-2})^{-\frac{1}{2}} \\ w_A &= \frac{\sigma_M^2}{\sigma_A^2}, \quad w_V = \frac{\sigma_M^2}{\sigma_V^2} \end{aligned} \quad (3)$$

658 The likelihood of seeing the observations as a function of the hypothesized category  $c$ , is given  
 659 by marginalizing over all possible hypothesized stimulus rates. Let the experimentally imposed  
 660 category boundary be  $\mu_0$ , such that stimulus rates are considered high when  $s > \mu_0$  and low when

661  $s < \mu_0$ . Then,

$$\begin{aligned}
 \mathcal{L}(c = \text{High}) &= p(x_A, x_V | c = \text{High}) \\
 &= \int_s p(x_A, x_V, s | c = \text{High}) ds \\
 &= \int_s p(x_A, x_V | s) p(s | c = \text{High}) ds \quad \because x_a, x_V \perp c | s \\
 &= \int_{s > \mu_0} p(x_A, x_V | s) ds \\
 &\propto 1 - \Phi(\mu_0; \mu_M, \sigma_M)
 \end{aligned} \tag{4}$$

662 where  $\Phi$  is the cumulative normal function. Using Bayes' rule, the ideal observer can then compute  
 663 the probability that the current trial was high or low rate given the observations, i.e. the posterior  
 664 probability.

$$\begin{aligned}
 p(c | x_A, x_V) &= \frac{p(x_A, x_V | c) p(c)}{p(x_A, x_V)} \\
 \implies p(c = \text{High} | x_A, x_V) &\propto p_{\text{High}} (1 - \Phi(\mu_0; \mu_M, \sigma_M)) \\
 \implies p(c = \text{Low} | x_A, x_V) &\propto p_{\text{Low}} \Phi(\mu_0; \mu_M, \sigma_M)
 \end{aligned} \tag{5}$$

665 where  $p_{\text{High}}$  and  $p_{\text{Low}}$  are the prior probabilities of high and low rates respectively. The expected  
 666 value  $Q(a)$  of choosing right or left actions (also known as the action values) is obtained by  
 667 marginalizing the learnt value of state-action pairs  $q(c, a)$  over the unobserved state  $c$ .

$$\begin{aligned}
 Q(a = R) &= p(\text{High} | x_A, x_V) q(\text{High}, R) + p(\text{Low} | x_A, x_V) q(\text{Low}, R) \\
 Q(a = L) &= p(\text{High} | x_A, x_V) q(\text{High}, L) + p(\text{Low} | x_A, x_V) q(\text{Low}, L)
 \end{aligned} \tag{6}$$

668 Under the standard contingency, high rates are rewarded on the right and low rates on the left,  
 669 so for a trained observer that has fully learnt the contingency,  $q(High, R) \rightarrow r_R, q(High, L) \rightarrow$   
 670  $0, q(Low, R) \rightarrow 0, q(Low, L) \rightarrow r_L$ , with  $r_R$  and  $r_L$  being reward magnitudes for rightward and  
 671 leftward actions. This simplifies the action values to:

$$Q(R) = p(\text{High}|x_A, x_V)r_R \propto p_{High}(1 - \Phi(\mu_0; \mu_M, \sigma_M))r_R$$

$$Q(L) = p(\text{Low}|x_A, x_V)r_L \propto p_{Low}\Phi(\mu_0; \mu_M, \sigma_M)r_L$$
(7)

672 The max-reward decision rule involves picking the action  $\hat{a}$  with the highest expected reward:

$$\hat{a} = \operatorname{argmax}Q(a)$$

$$\text{i.e. } \hat{a} = R \iff Q(R) > Q(L)$$

$$\iff p_{High}(1 - \Phi(\mu_0; \mu_M, \sigma_M))r_R > p_{Low}\Phi(\mu_0; \mu_M, \sigma_M)r_L$$
(8)

$$\iff \Phi(\mu_M; \mu_0, \sigma_M) > \frac{1}{1 + \frac{p_{High}r_R}{p_{Low}r_L}}$$

$$\iff w_A x_A + w_V x_V > \Phi^{-1}\left(\frac{1}{1 + \frac{p_{High}r_R}{p_{Low}r_L}}; \mu_0, (\sigma_A^{-2} + \sigma_V^{-2})^{-\frac{1}{2}}\right)$$

673 In the special case of equal rewards and uniform stimulus and category priors, this reduces to  
 674 choosing right when the weighted sum of observations is to the right of the true category boundary,  
 675 i.e.  $w_A x_A + w_V x_V > \mu_0$ . Note that this is a deterministic decision rule for any given observations  
 676  $x_A$  and  $x_V$ , however, since these are noisy and gaussian distributed around the true stimulus rate  
 677  $s_{true}$ , the likelihood of making a rightward decision is given by the cumulative gaussian function  $\Phi$ :

678

For  $p_{High} = p_{Low}, r_R = r_L$

$$\begin{aligned} p(\hat{a} = R|s) &= p(w_A x_A + w_V x_V > \mu_0 | s) \\ &= \Phi(s_{true}; \mu_0, \sigma) \end{aligned} \tag{9}$$
$$\sigma = \begin{cases} \sigma_A \text{ on auditory trials} \\ \sigma_V \text{ on visual trials} \\ (\sigma_A^{-2} + \sigma_V^{-2})^{\frac{1}{2}} \text{ on multisensory trials} \end{cases}$$

679

680 We can measure this probability empirically through the psychometric curve. Fitting it with a two  
681 parameter cumulative gaussian function yields  $\mu$  and  $\sigma$  which can be compared to ideal observer  
682 predictions. The  $\sigma$  parameter is then taken to reflect sensory noise; and with the assumption of uni-  
683 form priors and equal rewards, the  $\mu$  parameter is taken to reflect the subjective category boundary.  
684 Although  $\mu$  should equal  $\mu_0$  for the ideal observer, in practice it is treated as a free parameter, and  
685 deviations of  $\mu$  from  $\mu_0$  could reflect any of three possible suboptimalities: 1) a subjective category  
686 boundary mismatched to the true one, 2) mismatched priors, or 3) unequal subjective rewards of the  
687 two actions.

688

### 689 *Inattention model*

690 The traditional model for lapse rates assumes that on a fixed proportion of trials, the animal fails to  
691 pay attention to the stimulus, guessing randomly between the two actions. We can incorporate this  
692 suboptimality into the ideal observer above as follows: Let the probability of attending be  $p_{attend}$ .



693 Then, on  $1 - p_{attend}$  fraction of trials, the animal does not attend to the stimulus (i.e. receives  
694 no evidence), effectively making  $\sigma_{sensory} \rightarrow \infty$  and giving rise to a posterior that is equal to the  
695 prior. On these trials, the animal may choose to maximize this prior (always picking the option  
696 that's more likely a-priori, guessing with 50-50 probability if both options are equally likely), or  
697 probability-match the prior (guessing in proportion to its prior). Let us call this guessing probability  
698  $p_{bias}$ . Then, the probability of a rightward decision is given by marginalizing over the attentional  
699 state:

700

$$\begin{aligned} p(\hat{a} = R|s) &= p(\hat{a} = R|s, \text{attend})p(\text{attend}) + p(\hat{a} = R|s, \sim \text{attend})p(\sim \text{attend}) \\ &= p(\hat{a} = R|s)p_{attend} + p_{bias}(1 - p_{attend}) \end{aligned} \quad (10)$$

701 Comparing this with the standard 4-parameter sigmoid used in psychometric fitting, we obtain

$$\begin{aligned} p(\hat{a} = R|s_{true}) &= \gamma + (1 - \gamma - \lambda)\Phi(s_{true}; \mu_0, \sigma) \\ \implies \gamma + \lambda &= p_{attend}, \quad \frac{\gamma}{\gamma + \lambda} = p_{bias} \end{aligned} \quad (11)$$

702 where  $\gamma$  and  $\lambda$  are the lower and upper asymptotes respectively, collectively known as “lapses”.  
703 In this model, the sum of the two lapses depends on the probability of attending, which could be  
704 modulated in a bottom up fashion by the salience of the stimulus; their ratio depends on the guessing  
705 probability, which in turn depends on the observer's priors and subjective rewards.

706

### 707 ***Motor error/ $\epsilon$ greedy model***

708 Lapses can also occur if the observer doesn't always pick the reward-maximizing or “exploit”

709 decision. This might occur due to random errors in motor execution on a small fraction of trials  
710 given by  $\epsilon$ , or it might reflect a deliberate propensity to occasionally make random “exploratory”  
711 choices to gather information about rules and rewards. This is known as an  $\epsilon$ -greedy decision rule,  
712 where the observer chooses randomly (or according to  $p_{bias}$ ) on  $\epsilon$  fraction of trials. Both these  
713 models yield predictions similar to those of the inattention model:

$$\begin{aligned} p(\hat{a} = R|s) &= p(\hat{a} = R|s)(1 - \epsilon) + \epsilon p_{bias} \\ \implies \gamma + \lambda &= \epsilon, \quad \frac{\gamma}{\gamma + \lambda} = p_{bias} \end{aligned} \tag{12}$$

714

### 715 *Uncertainty guided exploration model*

716 A more sophisticated form of exploration is the “softmax” decision rule, which explores options in  
717 proportion to their expected rewards, allowing for a balance between exploration and exploitation  
718 through the tuning of a parameter  $\beta$  known as inverse temperature. In particular, in conditions of  
719 greater uncertainty about rules or rewards, it is advantageous to be more exploratory and have a  
720 lower  $\beta$ . This form of uncertainty-guided exploration is known as Thompson sampling. It can  
721 be implemented by sampling from a belief distribution over expected rewards and maximizing  
722 with respect to the sample, reducing to a softmax rule whose  $\beta$  depends on the total uncertainty in  
723 expected reward (Gershman, 2018).

$$\begin{aligned} p(\hat{a} = R|Q(a)) &= \frac{\exp \beta Q(R)}{\exp \beta Q(L) + \exp \beta Q(R)} \\ &= \frac{1}{1 + \exp(-\beta(Q(R) - Q(L)))} \end{aligned} \tag{13}$$

724 The proportion of rightward choices conditioned on the true stimulus rate is then obtained  
 725 by marginalizing over the latent action values  $Q(a)$ , using the fact that the choice depends on  $s$   
 726 only through its effect on  $Q(a)$ , where  $\rho$  is the animal's posterior belief in a high rate stimulus,  
 727 i.e.  $\rho = p(c = High|x_A, x_V)$ .  $\rho$  is often referred to as the *belief state* in reinforcement learning  
 728 problems involving partial observability such as our task.

$$\begin{aligned}
 p(\hat{a} = R|s) &= \int_{Q(a)} p(\hat{a} = R, Q(a)|s) dQ \\
 &= \int_{Q(a)} p(\hat{a} = R|Q(a)) p(Q(a)|s) dQ \quad \because \hat{a} \perp s|Q(a) \\
 &= \int_{\rho} \frac{1}{1 + \exp(-\beta(\rho(r_R + r_L) - r_L))} \frac{\mathcal{N}(\Phi^{-1}(1 - \rho), 0, \sigma_{post}), \mu_0 - s, \sigma_{post})}{\mathcal{N}(\Phi^{-1}(1 - \rho), 0, \sigma_{post}))} d\rho
 \end{aligned} \tag{14}$$

729 Since lapses are the asymptotic probabilities of the lesser rewarding action at extremely easy  
 730 stimulus rates, we can derive them from this expression by setting  $\rho \rightarrow 1$  or  $\rho \rightarrow 0$ . This yields

$$\gamma = \frac{1}{1 + \exp(\beta r_L)}, \quad \lambda = \frac{1}{1 + \exp(\beta r_R)} \tag{15}$$

731 Critically, in this model, the upper and lower lapses are dissociable, depending only on the  
 732 rightward or leftward rewards, respectively. Such a softmax decision rule has been used to account  
 733 for suboptimalities in value based decisions (Dayan and Daw, 2008), however it has not been  
 734 used to account for lapses in perceptual decisions. Other suboptimal decision rules described  
 735 in perceptual decisions, such as generalized probability matching or posterior sampling (Acerbi,  
 736 Vijayakumar, and Wolpert, 2014; Drugowitsch, Wyart, et al., 2016; Ortega and Braun, 2013) amount

737 to a softmax on log-posteriors or log-expected values, rather than on expected values, and do not  
738 produce lapses since in these decision rules, when the posterior probability goes to 1, so does the  
739 decision probability.

740

#### 741 **Model fitting**

742 Model fits were obtained from custom maximum likelihood fitting code using MATLAB's fmincon,  
743 by maximizing the marginal likelihood of rightward choices given the stimulus on each trial as  
744 computed from each model. Confidence intervals for fit parameters were generated using the hessian  
745 obtained from fmincon. Fits to multiple conditions were performed jointly, taking into account any  
746 linear or nonlinear (eg. optimality) constraints on parameters across conditions. Model comparisons  
747 were done using AIC and BIC.

#### 748 **Surgical procedures**

749 All rats subject to surgery were anesthetized with 1%-3% isoflurane. Isoflurane anesthesia was  
750 maintained by monitoring respiration, heart rate, oxygen and CO<sub>2</sub> levels, as well as foot pinch  
751 responses throughout the surgical procedure. Ophthalmic ointment was applied to keep the eyes  
752 moistened throughout surgery. After scalp shaving, the skin was cleaned with 70% ethanol and 5%  
753 betadine solution. Lidocaine solution was injected below the scalp to provide local analgesia prior  
754 to performing scalp incisions. Meloxicam (5mg/ml) was administered subcutaneously (2mg/kg)  
755 for analgesia at the beginning of the surgery, and daily 2-3 days post-surgery. The animals were  
756 allowed at least 7 days to recover before behavioral training.

757 ***Viral injections***- 2 rats, 15 weeks of age, were anesthetized and placed in a stereotaxic apparatus  
758 (Kopf Instruments). Small craniotomies were made in the center of primary visual cortex (V1;  
759 6.9mm posterior to Bregma, 4.2mm to the right of midline) and primary auditory cortex (A1;  
760 4.7mm posterior to Bregma, 7mm to the right of midline). Small durotomies were performed  
761 at each craniotomy and virus was pressure injected at depths of 600, 800, and 1000  $\mu\text{m}$  below  
762 the pia (150 nL/depth). Virus injections were performed using Drummond Nanoject III, which  
763 enables automated delivery of small volumes of virus. To minimize virus spread, the Nanoject  
764 was programmed to inject slowly: fifteen 10 nL boluses, 30 seconds apart. Each bolus was  
765 delivered at 10 nL/sec. 2-3 minutes were allowed following injection at each depth to allow for  
766 diffusion of virus. The AAV2.CB7.CI.EGFP.WPRE.RBG construct was injected in V1, and the  
767 AAV2.CAG.tdTomato.WPRE.SV40 construct was injected in A1. Viruses were obtained from the  
768 University of Pennsylvania vector core.

769 ***Cannulae implants*** Rats were anesthetized and placed in the stereotax as described above. After  
770 incision and skull cleaning, 2 skull screws were implanted to add more surface area for the dental  
771 cement. For striatal implants, two craniotomies were made, one each side of the skull (3.2mm  
772 posterior to Bregma; 5.4mm to the right and left of midline). Durotomies were performed and a  
773 guide cannula (22 gauge, 8.5 mm long; PlasticsOne) was placed in the brain, 4.1mm below the pia  
774 at each craniotomy. For secondary motor cortex implants, one large craniotomy spanning the right  
775 and left M2 was performed (~5mm x ~2mm in size centered around 2mm anterior to Bregma and  
776 3.1mm to the right and left of midline). A durotomy was performed and a double guide cannula  
777 (22 gauge, 4mm long; PlasticsOne) was placed in the brain, 300 $\mu\text{m}$  below the pia. The exposed

778 brain was covered with sterile Vaseline and cannulae were anchored to the skull with dental acrylic  
779 (Relyx). Single or double dummy cannulae protruding 0.7 mm below the guide cannulae were  
780 inserted.

### 781 **Inactivation with muscimol**

782 Rats were lightly anesthetized with isoflurane. Muscimol was unilaterally infused into pStr or M2  
783 with a final concentration of 0.075-0.125  $\mu\text{g}$  and 0.1-0.5  $\mu\text{g}$ , respectively. A single/double-internal  
784 cannula (PlasticsOne), connected to a 2  $\mu\text{l}$  syringe (Hamilton microliter syringe, 7000 series), was  
785 inserted into each previously implanted guide cannula. Internal cannulae protruded 0.5mm below  
786 the guide. Muscimol was delivered using an infusion pump (Harvard PHD 22/2000) at a rate of 0.1  
787  $\mu\text{l}/\text{minute}$ . Internal cannulae were kept in the brain for 3 additional minutes to allow for diffusion  
788 of muscimol. Rats were removed from anesthesia and returned to cages for 15 minutes before  
789 beginning behavioral sessions. The same procedure was used in control sessions, where muscimol  
790 was replaced with sterile saline.

### 791 **Histology**

792 At the conclusion of inactivation experiments, animals were deeply anesthetized with Euthasol  
793 (pentobarbital and phenytoin). Animals were perfused transcardially with 4% paraformaldehyde.  
794 Brains were extracted and post-fixed in 4% paraformaldehyde for 24-48 hours. After post-fixing,  
795 50-100  $\mu\text{m}$  coronal sections were cut on a vibratome (Leica) and imaged.

## 796 **References**

- 797 Acerbi, Luigi, Sethu Vijayakumar, and Daniel M Wolpert (2014). “On the origins of suboptimality  
798 in human probabilistic inference”. In: *PLoS computational biology* 10.6, e1003661.
- 799 Babayan, Benedicte M, Naoshige Uchida, and Samuel J Gershman (2018). “Belief state representa-  
800 tion in the dopamine system”. In: *Nature communications* 9.1, p. 1891.
- 801 Barthas, Florent and Alex C Kwan (2017). “Secondary motor cortex- where sensory meets motor in  
802 the rodent frontal cortex”. In: *Trends in neurosciences* 40.3, pp. 181–193.
- 803 Bays, Paul M, Raquel FG Catalao, and Masud Husain (2009). “The precision of visual working  
804 memory is set by allocation of a shared resource”. In: *Journal of vision* 9.10, pp. 7–7.
- 805 Beeler, Jeff A et al. (2010). “Tonic dopamine modulates exploitation of reward learning”. In:  
806 *Frontiers in behavioral neuroscience* 4, p. 170.
- 807 Bertolini, Giovanni et al. (2015). “Impaired tilt perception in Parkinsons disease- a central vestibular  
808 integration failure”. In: *PloS one* 10.4, e0124253.
- 809 Bogacz, Rafal et al. (2006). “The physics of optimal decision making: a formal analysis of models of  
810 performance in two-alternative forced-choice tasks.” In: *Psychological review* 113.4, p. 700.
- 811 Busse, Laura et al. (2011). “The detection of visual contrast in the behaving mouse”. In: *Journal of*  
812 *Neuroscience* 31.31, pp. 11351–11361.
- 813 Carandini, Matteo and Anne K Churchland (2013). “Probing perceptual decisions in rodents”. In:  
814 *Nature neuroscience* 16.7, p. 824.
- 815 Cloherty, Shaun L et al. (2019). “Motion perception in the common marmoset”. In: *bioRxiv*,  
816 p. 522888.

- 817 Dayan, Peter and Nathaniel D Daw (2008). “Decision theory, reinforcement learning, and the brain”.  
818 In: *Cognitive, Affective, & Behavioral Neuroscience* 8.4, pp. 429–453.
- 819 Drugowitsch, Jan, Gregory C DeAngelis, et al. (2014). “Optimal multisensory decision-making in a  
820 reaction-time task”. In: *Elife* 3, e03005.
- 821 Drugowitsch, Jan and Alexandre Pouget (2018). “Learning optimal decisions with confidence”. In:  
822 *bioRxiv*, p. 244269.
- 823 Drugowitsch, Jan, Valentin Wyart, et al. (2016). “Computational precision of mental inference as  
824 critical source of human choice suboptimality”. In: *Neuron* 92.6, pp. 1398–1411.
- 825 Erlich, Jeffrey C et al. (2015). “Distinct effects of prefrontal and parietal cortex inactivations on an  
826 accumulation of evidence task in the rat”. In: *Elife* 4, e05457.
- 827 Ernst, Marc O and Heinrich H Bulthoff (2004). “Merging the senses into a robust percept”. In:  
828 *Trends in cognitive sciences* 8.4, pp. 162–169.
- 829 Fan, Yunshu, Joshua I Gold, and Long Ding (2018). “Ongoing, rational calibration of reward-driven  
830 perceptual biases”. In: *Elife* 7, e36018.
- 831 Findling, Charles et al. (2018). “Computational noise in reward-guided learning drives behavioral  
832 variability in volatile environments”. In: *bioRxiv*, p. 439885.
- 833 Flesch, Timo et al. (2018). “Comparing continual task learning in minds and machines”. In: *Pro-*  
834 *ceedings of the National Academy of Sciences* 115.44, E10313–E10322.
- 835 Frank, Michael J et al. (2009). “Prefrontal and striatal dopaminergic genes predict individual  
836 differences in exploration and exploitation”. In: *Nature neuroscience* 12.8, p. 1062.



- 837 Garrido, Marta I, Raymond J Dolan, and Maneesh Sahani (2011). “Surprise leads to noisier  
838 perceptual decisions”. In: *i-Perception* 2.2, pp. 112–120.
- 839 Gershman, Samuel J (2015). “A unifying probabilistic view of associative learning”. In: *PLoS*  
840 *computational biology* 11.11, e1004567.
- 841 — (2018). “Deconstructing the human algorithms for exploration”. In: *Cognition* 173, pp. 34–42.
- 842 Gold, Joshua I and Long Ding (2013). “How mechanisms of perceptual decision-making affect the  
843 psychometric function”. In: *Progress in neurobiology* 103, pp. 98–114.
- 844 Green, David M, John A Swets, et al. (1966). *Signal detection theory and psychophysics*. Vol. 1.  
845 Wiley New York.
- 846 Guo, Lan et al. (2018). “Stable representation of sounds in the posterior striatum during flexible  
847 auditory decisions”. In: *Nature communications* 9.1, p. 1534.
- 848 Hou, Han et al. (2018). “Neural correlates of optimal multisensory decision making”. In: *bioRxiv*,  
849 p. 480178.
- 850 Jiang, Haiyan and Hyoungh F Kim (2018). “Anatomical inputs from the sensory and value structures  
851 to the tail of the rat striatum”. In: *Frontiers in neuroanatomy* 12.
- 852 Lak, Armin et al. (2018). “Dopaminergic and frontal signals for decisions guided by sensory  
853 evidence and reward value”. In: *bioRxiv*, p. 411413.
- 854 Law, Chi-Tat and Joshua I Gold (2009). “Reinforcement learning can account for associative and  
855 perceptual learning on a visual-decision task”. In: *Nature neuroscience* 12.5, p. 655.

- 856 Leblois, Arthur, Benjamin J Wendel, and David J Perkel (2010). “Striatal dopamine modulates  
857 basal ganglia output and regulates social context-dependent behavioral variability through D1  
858 receptors”. In: *Journal of Neuroscience* 30.16, pp. 5730–5743.
- 859 Lee, A Moses et al. (2015). “Between the primate and reptilian brain- rodent models demonstrate  
860 the role of corticostriatal circuits in decision making”. In: *Neuroscience* 296, pp. 66–74.
- 861 Leike, Jan et al. (2016). “Thompson sampling is asymptotically optimal in general environments”.  
862 In: *arXiv preprint arXiv:1602.07905*.
- 863 Licata, Angela M et al. (2017). “Posterior parietal cortex guides visual decisions in rats”. In: *Journal  
864 of Neuroscience* 37.19, pp. 4954–4966.
- 865 Lucas, Christopher G et al. (2014). “When children are better (or at least more open-minded)  
866 learners than adults: Developmental differences in learning the forms of causal relationships”.  
867 In: *Cognition* 131.2, pp. 284–299.
- 868 Manning, Catherine et al. (2018). “Psychophysics with children: Investigating the effects of at-  
869 tentional lapses on threshold estimates”. In: *Attention, Perception, & Psychophysics*, pp. 1–  
870 14.
- 871 Mastrogiorgio, Antonio and Enrico Petracca (2018). “Satisficing as an alternative to optimality  
872 and suboptimality in perceptual decision making”. In: *The Behavioral and brain sciences* 41,  
873 e235–e235.
- 874 Mendonca, Andre G et al. (2018). “The impact of learning on perceptual decisions and its implication  
875 for speed-accuracy tradeoffs”. In: *bioRxiv*, p. 501858.

- 876 Mihali, Andra et al. (2018). “A Low-Level Perceptual Correlate of Behavioral and Clinical Deficits  
877 in ADHD”. In: pp. 1–23.
- 878 Nikbakht, Nader et al. (2018). “Supralinear and supramodal integration of visual and tactile signals  
879 in rats: psychophysics and neuronal mechanisms”. In: *Neuron* 97.3, pp. 626–639.
- 880 Odoemene, Onyekachi et al. (2018). “Visual evidence accumulation guides decision-making in  
881 unrestrained mice”. In: *Journal of Neuroscience* 38.47, pp. 10143–10155.
- 882 Ortega, Pedro A and Daniel A Braun (2013). “Thermodynamics as a theory of decision-making  
883 with information-processing costs”. In: *Proceedings of the Royal Society A: Mathematical,  
884 Physical and Engineering Sciences* 469.2153, p. 20120683.
- 885 Piet, Alex T et al. (2017). “Rat prefrontal cortex inactivations during decision making are explained  
886 by bistable attractor dynamics”. In: *Neural computation* 29.11, pp. 2861–2886.
- 887 Pinto, Lucas et al. (2018). “An accumulation-of-evidence task using visual pulses for mice navigating  
888 in virtual reality”. In: *Frontiers in behavioral neuroscience* 12, p. 36.
- 889 Prins, Nicolaas and Frederick AA Kingdom (2018). “Applying the model-comparison approach to  
890 test specific research hypotheses in psychophysical research using the Palamedes Toolbox”.  
891 In: *Frontiers in psychology* 9.
- 892 Raposo, David, Matthew T Kaufman, and Anne K Churchland (2014). “A category-free neural  
893 population supports evolving demands during decision-making”. In: *Nature neuroscience*  
894 17.12, p. 1784.
- 895 Raposo, David, John P Sheppard, et al. (2012). “Multisensory decision-making in rats and humans”.  
896 In: *Journal of neuroscience* 32.11, pp. 3726–3735.

- 897 Roach, Neil W, Veronica T Edwards, and John H Hogben (2004). “The tale is in the tail: An  
898 alternative hypothesis for psychophysical performance variability in dyslexia”. In: *Perception*  
899 33.7, pp. 817–830.
- 900 Roy, Nicholas G et al. (2018). “Efficient inference for time-varying behavior during learning”. In:  
901 *Advances in Neural Information Processing Systems*, pp. 5700–5710.
- 902 Scott, Benjamin B et al. (2015). “Sources of noise during accumulation of evidence in unrestrained  
903 and voluntarily head-restrained rats”. In: *Elife* 4, e11308.
- 904 Shen, Shan and Wei Ji Ma (2019). “Variable precision in visual perception.” In: *Psychological*  
905 *review* 126.1, p. 89.
- 906 Sheppard, John P, David Raposo, and Anne K Churchland (2013). “Dynamic weighting of mul-  
907 tisensory stimuli shapes decision-making in rats and humans”. In: *Journal of vision* 13.6,  
908 pp. 4–4.
- 909 Starkweather, Clara Kwon et al. (2017). “Dopamine reward prediction errors reflect hidden-state  
910 inference across time”. In: *Nature neuroscience* 20.4, p. 581.
- 911 Wang, Lupeng et al. (2018). “Activation of striatal neurons causes a perceptual decision bias during  
912 visual change detection in mice”. In: *Neuron* 97.6, pp. 1369–1381.
- 913 Wichmann, Felix A and N Jeremy Hill (2001). “The psychometric function: I. Fitting, sampling,  
914 and goodness of fit”. In: *Perception & psychophysics* 63.8, pp. 1293–1313.
- 915 Witton, Caroline, Joel B Talcott, and G Bruce Henning (2017). “Psychophysical measurements in  
916 children: challenges, pitfalls, and considerations”. In: *PeerJ* 5, e3231.

917 Yartsev, Michael M et al. (2018). “Causal contribution and dynamical encoding in the striatum  
918 during evidence accumulation.” In: *Elife* 7.

919 Yu, Angela J and Jonathan D Cohen (2009). “Sequential effects: superstition or rational behavior?”  
920 In: *Advances in neural information processing systems*, pp. 1873–1880.

921 Zatzka-Haas, Peter et al. (2019). “Distinct contributions of mouse cortical areas to visual discrimina-  
922 tion”. In: *bioRxiv*, p. 501627.

923 Zhou, Baohua et al. (2018). “Chance, long tails, and inference in a non-Gaussian, Bayesian theory  
924 of vocal learning in songbirds”. In: *Proceedings of the National Academy of Sciences* 115.36,  
925 E8538–E8546.

926 **Acknowledgements** We thank Matt Kaufman, Simon Musall, Onyekachi Odoemene, Ashley Juavinett,  
927 Farzaneh Najafi, Akihiro Funamizu, Priyanka Gupta, Anne Urai, James Roach, Colin Stoneking, Diksha  
928 Gupta, Tatiana Engel, Rob Phillips, Tony Zador, Steve Shea and Bo Li for scientific advice and discussions,  
929 and Angela Licata, Steven Gluf, Liete Einhorn, Dennis Maharjan, Alexa Pagliaro, Edward Lu and Barry  
930 Burbach for technical assistance. We thank Partha Mitra, Alexander Tolpygo and Stephen Savoia for help  
931 with slicing and imaging virus injected brains. This work was supported by the Simons Collaboration on the  
932 Global Brain, ONR MURI, the Eleanor Schwartz Fund, the Pew Charitable Trust and the Watson School of  
933 Biological Sciences.

934 **Competing Interests** The authors declare that they have no competing financial interests.

935 **Correspondence** Correspondence and requests for materials should be addressed to Anne K. Church-  
936 land (email: churchland@cshl.edu).

1

Supplementary figure 1

Schematic model predictions

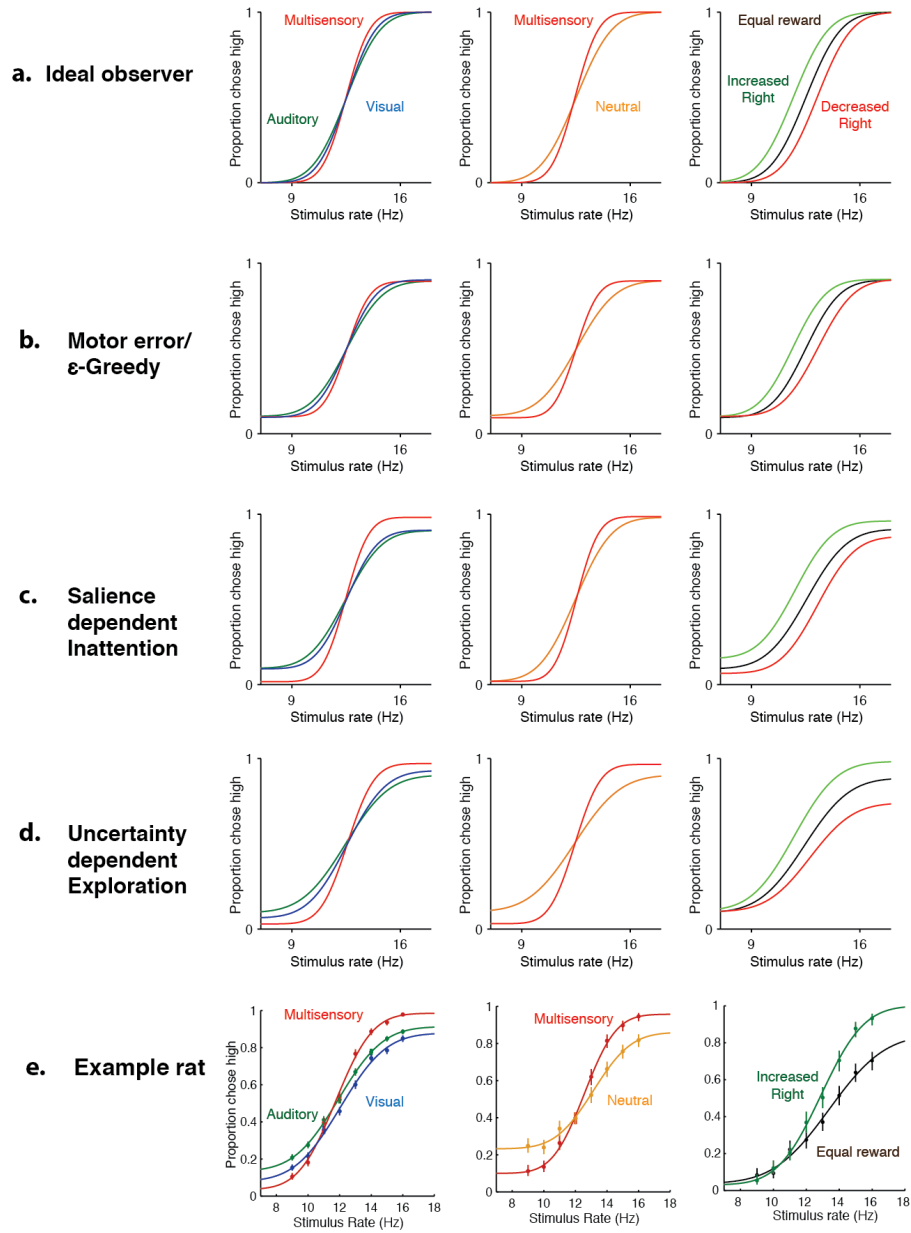

2

3 **Supplementary Figure 1: Uncertainty-dependent exploration is the only model that accounts for be-**  
4 **havioral data from all three manipulations** Columns: data/predictions for three experimen-

5 lations. Left: unisensory vs. multisensory. Middle: matched vs. neutral. Right: Asymmetric reward.  
6 a-d: Four candidate models. (a) Ideal observer model predicts no lapses and only changes in sensitiv-  
7 ity/bias across conditions. (b) Fixed motor error model predicts a constant rate of lapses across condi-  
8 tions in addition to changes in sensitivity/bias predicted from the ideal observer. (c) Inattention model  
9 predicts that the overall lapse rate (sum of lapses on both sides) depends on the level of bottom-up at-  
10 tentional salience, allowing for different rates for unisensory and multisensory. It also predicts that the  
11 lapse rate on neutral trials should be equal to that on multisensory trials, and that manipulating right-  
12 ward reward should affect both lapse rates. (d) Uncertainty-dependent exploration model predicts that  
13 overall lapse rate depends on the level of exploratoriness and hence uncertainty associated with that  
14 condition, allowing for different lapse rates on unisensory and multisensory trials. It also predicts that  
15 the lapse rate on neutral trials should be equal to that on auditory trials and manipulating rightward  
16 reward should only affect high rate lapses. (e) Data from an example rat on all three manipulations.

## Supplementary figure 2

### a. Perceptual discrimination task

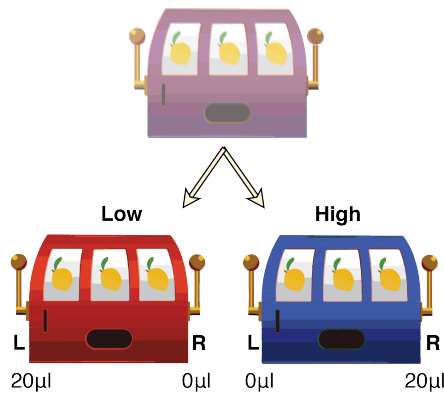

### b. Exploration-exploitation tradeoff

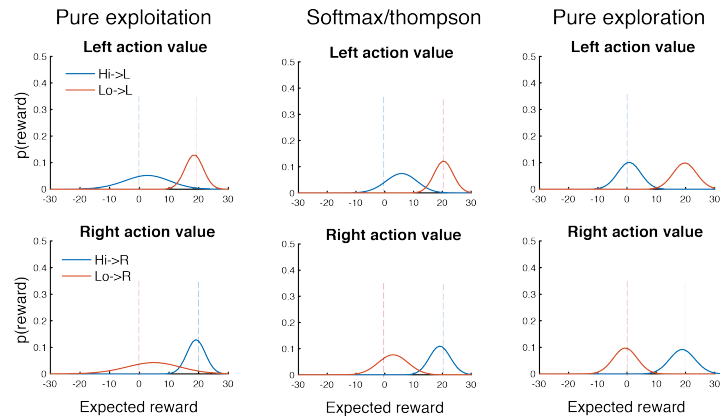

### c. Dependence of value beliefs on sensory noise

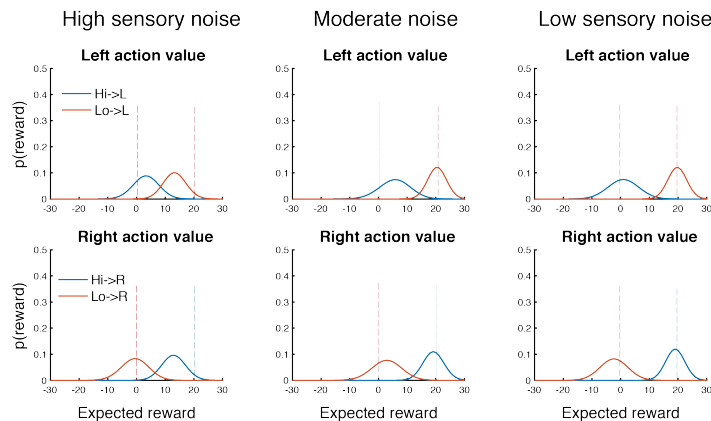

### d. Simulated performance

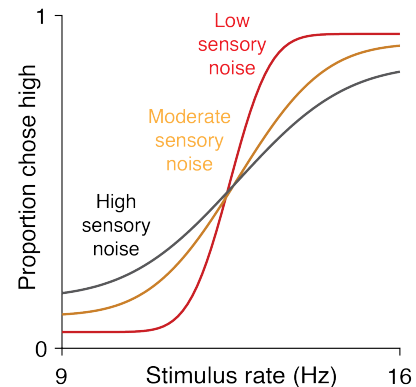

17

18 **Supplementary Figure 2: Thompson sampling, which balances exploration and exploitation, predicts**

19 **lapses that increase with perceptual noise** Schematic illustrating the explore-exploit tradeoff in perceptual

20 two-alternative tasks. (a) Formulation of perceptual decision making task as a partially observable contextual

21 bandit. To solve this task, an observer needs to infer the true category of the stimulus (Low or High) based

22 on noisy observations, and pick the best action given the true category (Left for Low, Right for High). This

23 requires accurately learning the expected rewards from all 4 state-action pairs. (b) Beliefs about expected

24 reward from different actions (L,R) performed in different states (Hi, Lo) showing different levels of un-



25 certainty depending on policy. Beliefs are updated based on outcomes using a Bayesian update rule that  
26 takes into account uncertainty in state estimation. A greedy policy (left) that always picks the best action  
27 maximizes reward and learns well about the preferred state-action pairs (i.e. Lo-L and Hi-R) but has high  
28 uncertainty about the non-preferred pairs (Lo-R, Hi-L). A random policy (right) earns reward at chance, but  
29 learns equally well about all state-action pairs. Thompson sampling (center) implements a softmax decision  
30 rule that depends on the current uncertainties in each value, and balances immediately reward-maximizing  
31 decisions with decisions that reduce uncertainty, maximizing average reward in the long term. (c) Learnt  
32 beliefs about expected reward with Thompson sampling at various levels of perceptual uncertainty. High  
33 sensory noise (left) leads to large perceptual uncertainty, yielding highly overlapping belief distributions  
34 owing to a reduced ability to assign obtained rewards to one of the states. Lower levels of sensory noise  
35 (center, right) produce more separable beliefs. (d) Simulated performance over 2000 trials of the Bayesian  
36 learner shown above, under a Thompson sampling policy. As the sensory noise decreases (Black to Yellow to  
37 Red), the observer makes fewer exploratory choices owing to the more separable value beliefs, giving rise to  
38 lower lapse rates.

### Supplementary figure 3

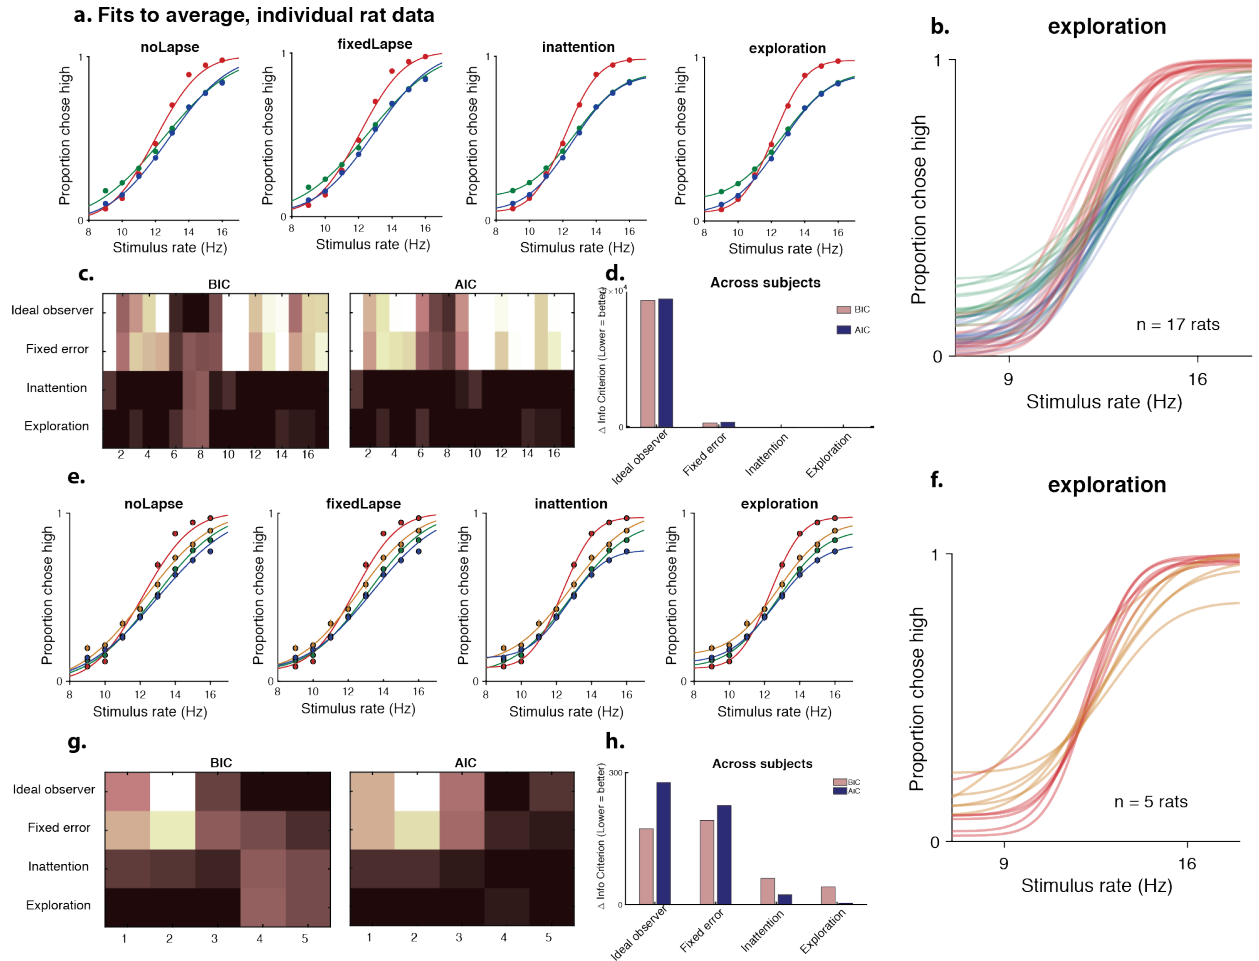

39

### 40 **Supplementary Figure 3: Uncertainty guided exploration outperforms competing models for average**

41 **and individual data** (a) Fits of the four models to average rat data on unisensory (blue-visual, green-auditory)

42 and multisensory (red) trials. (b) Exploration model fits to unisensory and multisensory data for 17 individual

43 animals (c) Model comparison for individual animals using BIC (left), AIC (right). Darker colors are lower

44 BICs/AICs, denoting a better fit. (d) Summed model comparison metrics across animals, showing that

45 inattention and exploration models fit the data equally well, and much better than the ideal observer or fixed

46 error models. (e) Fits of the four models to average data including neutral trials (orange) provide a stronger

47 test of the inattention model. (f) Exploration model fits to multisensory data including neutral trials for 5

48 individual animals (g) Model comparison for individual animals. (h) Summed model comparison metrics

49 across animals shows that the uncertainty-guided exploration model performs better than other models.

50

### Supplementary figure 4

#### a. Effort-dependent disengagement & guessing

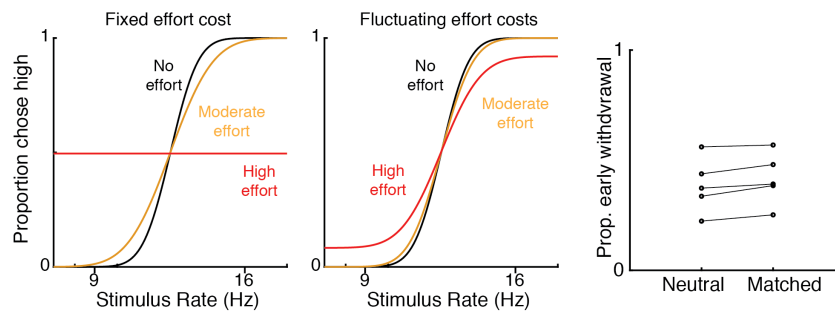

#### c.

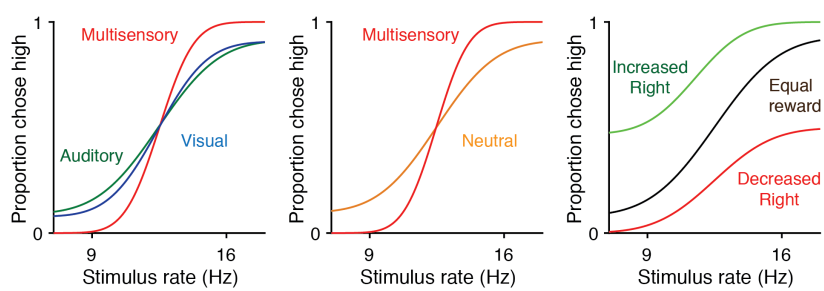

#### d. Temporal inattention

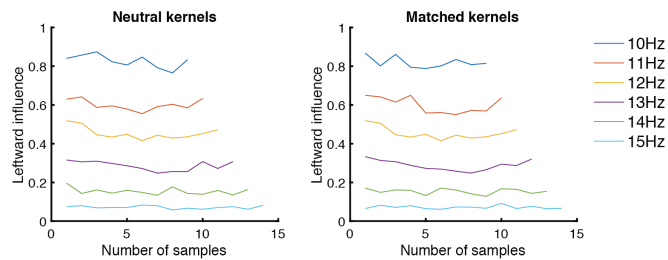

#### e. Variable precision

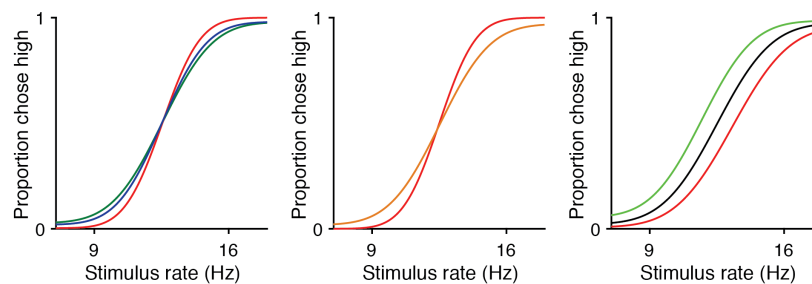

51

52 **Supplementary Figure 4: Alternative models of inattentional lapses.** Predictions of alternative models of  
53 lapses. (a) Effort-dependent disengagement model: In this model, there is an additional cost or mental effort  
54 to being engaged in the task which could vary with condition, and an additional random guessing action. If  
55 the net payoff of engagement is not greater than the average value of a guess, then it guesses randomly. Such  
56 a model does not produce lapses if the effort is fixed across trials (left), but could produce lapses if the effort  
57 fluctuates from trial to trial (center). (b) Proportion of trials on which the animal withdrew prematurely doesn't  
58 vary between matched and neutral trials, suggesting that rats are not disengaging preferentially on neutral  
59 trials. (c) Predictions of the effort-dependent disengagement model. The model accurately predicts increased  
60 lapses on unisensory trials (left panel, green/blue traces) and neutral multisensory trials (middle panel, orange  
61 trace). However, for asymmetric reward manipulations (right), the model fails to predict our behavioral  
62 observation (Fig. 4d) that only lapses on the manipulated side are affected. (d) Temporal inattention model:  
63 in this model, temporal weighting of evidence differs between matched and neutral trials. To test this, we  
64 compared psychophysical kernels on matched and neutral trials. The temporal dynamics of attention are  
65 unchanged between the two kinds of trials, arguing against the temporal inattention model. (e) Variable  
66 precision model: in this model, the sensory noise (or its inverse, precision) fluctuates from trial to trial. The  
67 model accurately predicts increased lapses on unisensory trials (left panel, green/blue traces) and neutral  
68 multisensory trials (middle panel, orange trace). However, for asymmetric reward manipulations (right), the  
69 model fails to predict our behavioral observation (Fig. 4d) that lapses only on the manipulated side are affected.  
70 Like other models of inattention, it predicts that manipulating reward on one side should affect both lapses.

## Supplementary Figure 5

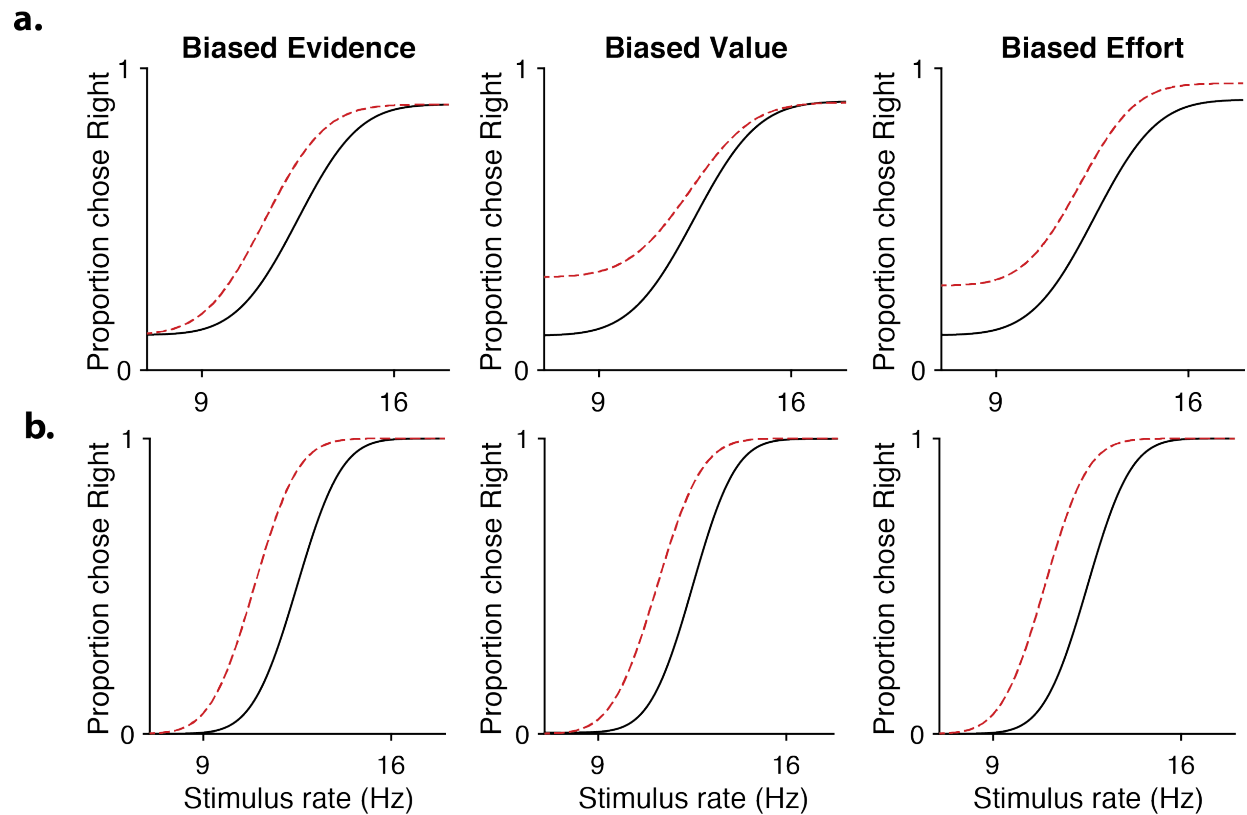

71

72 **Supplementary Figure 5: Lapses differentiate perturbations to different stages of the decision-making**

73 **process** (a) Model predictions for biased sensory evidence (left), decreased contralateral action value (center)

74 and increased effort in performing contralateral movements (right). The three kinds of perturbations affect de-

75 cisions at the sensory, value or motor stages and predict different effects on lapses. (b) All three perturbations

76 reduce to the same effect (horizontal shift) in the absence of lapses.

77

## Supplementary figure 6

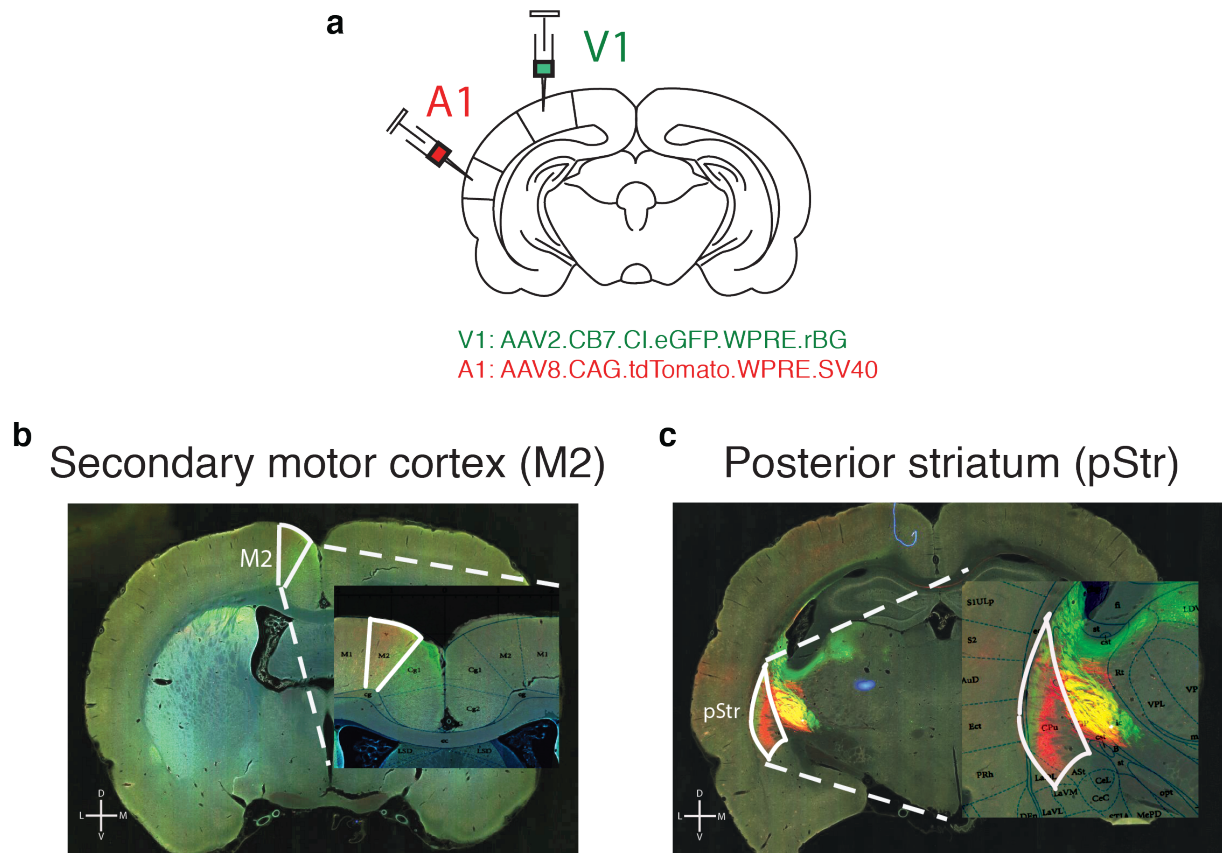

78

79 **Supplementary Figure 6: pStr and M2 receive direct projections from visual and auditory cortex** (a)

80 Schematic of tracing experiments. AAV2.CB7.Cl.eGFP.WPRE.RBG and AAV2.CAG.tdTomato.WPRE.SV40

81 constructs were injected unilaterally to primary visual (V1) and auditory (A1) cortices, respectively (V1

82 coordinates: 6.9 mm posterior to Bregma; 4.2 mm to the right of midline; A1 coordinates: 4.7 mm posterior

83 to Bregma; 7 mm to the right of midline). (b) Secondary motor cortex (M2) receives inputs from V1 and A1

84 as shown by green and red fluorescence. (c) Posterior striatum (pStr) receives direct inputs from V1 and A1

85 as shown by green and red fluorescence. Yellow signal medial to pStr reflects overlapping passing fibers.

**Supplementary figure 7**

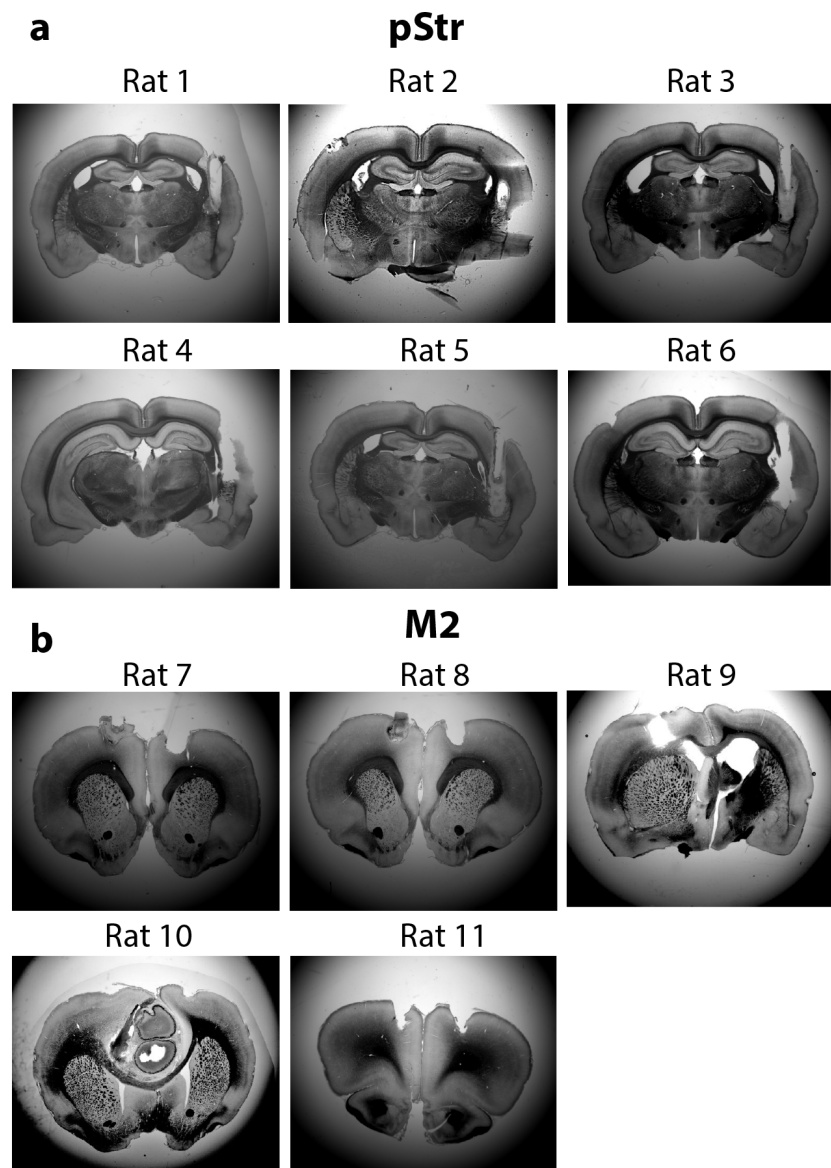

86

87 **Supplementary Figure 7: Histological slices of implanted rats** Representative coronal slices of all rats  
88 implanted with cannulae for muscimol inactivation experiments. (a) 6 rats were bilaterally implanted in  
89 posterior striatum (pStr). (b) 5 rats were implanted in secondary motor cortex (M2).

90

Supplementary figure 8

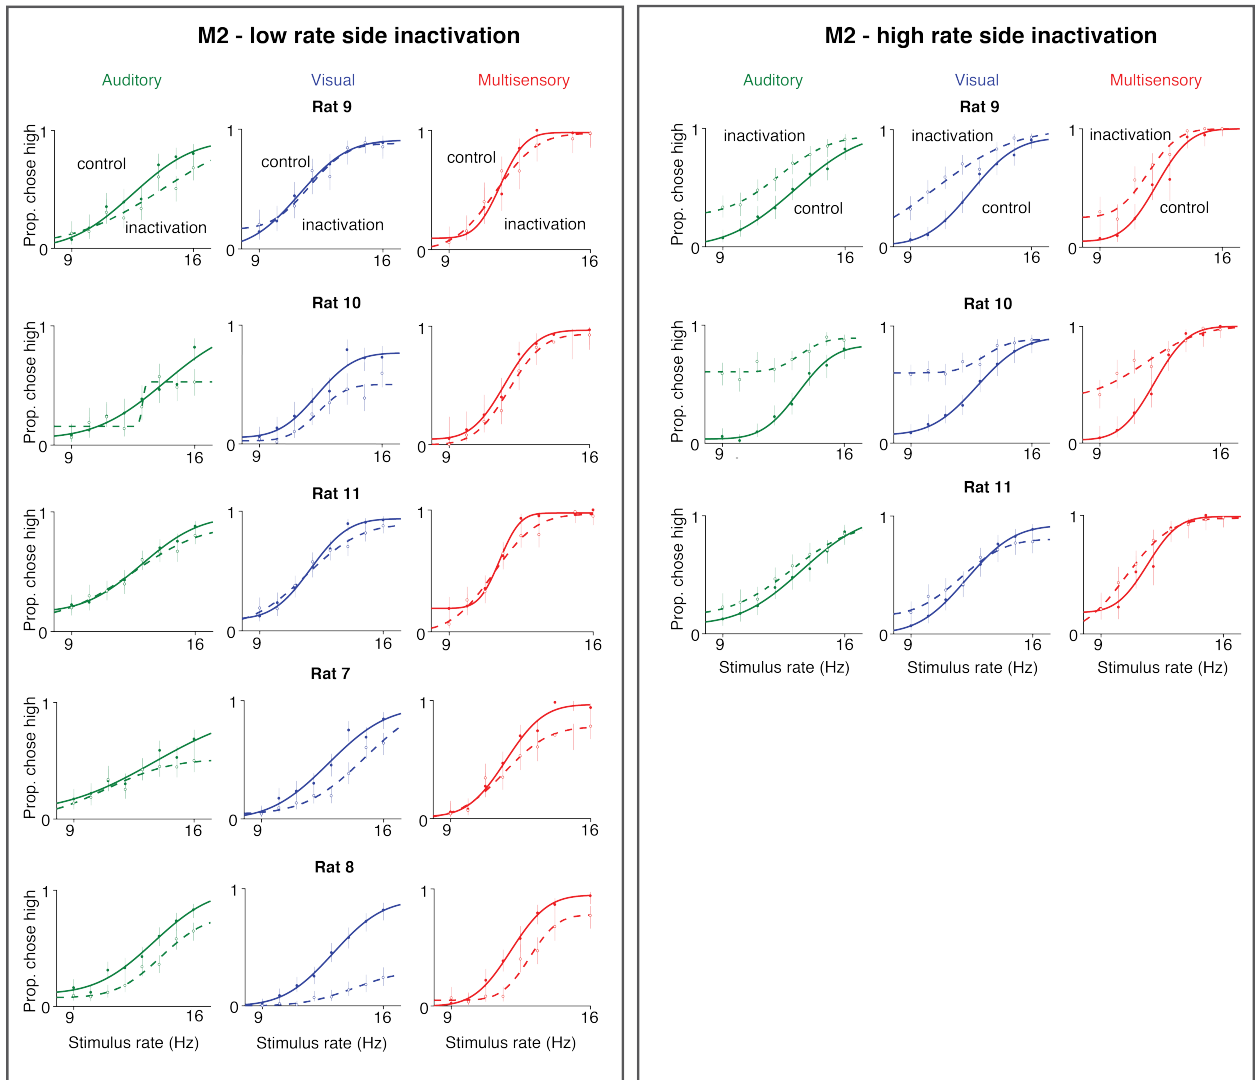

91

92 **Supplementary Figure 8: Single rat performance following M2 inactivation** Left: inactivation of the  
93 low-rate associated side. Rat shows increased lapses on high-rate trials on all sensory modalities. Right:  
94 inactivation of the high-rate associated side. Rat shows increased lapses on low-rate trials on all sensory  
95 modalities. Auditory (green), visual (blue) and multisensory (red).

96



Supplementary figure 9

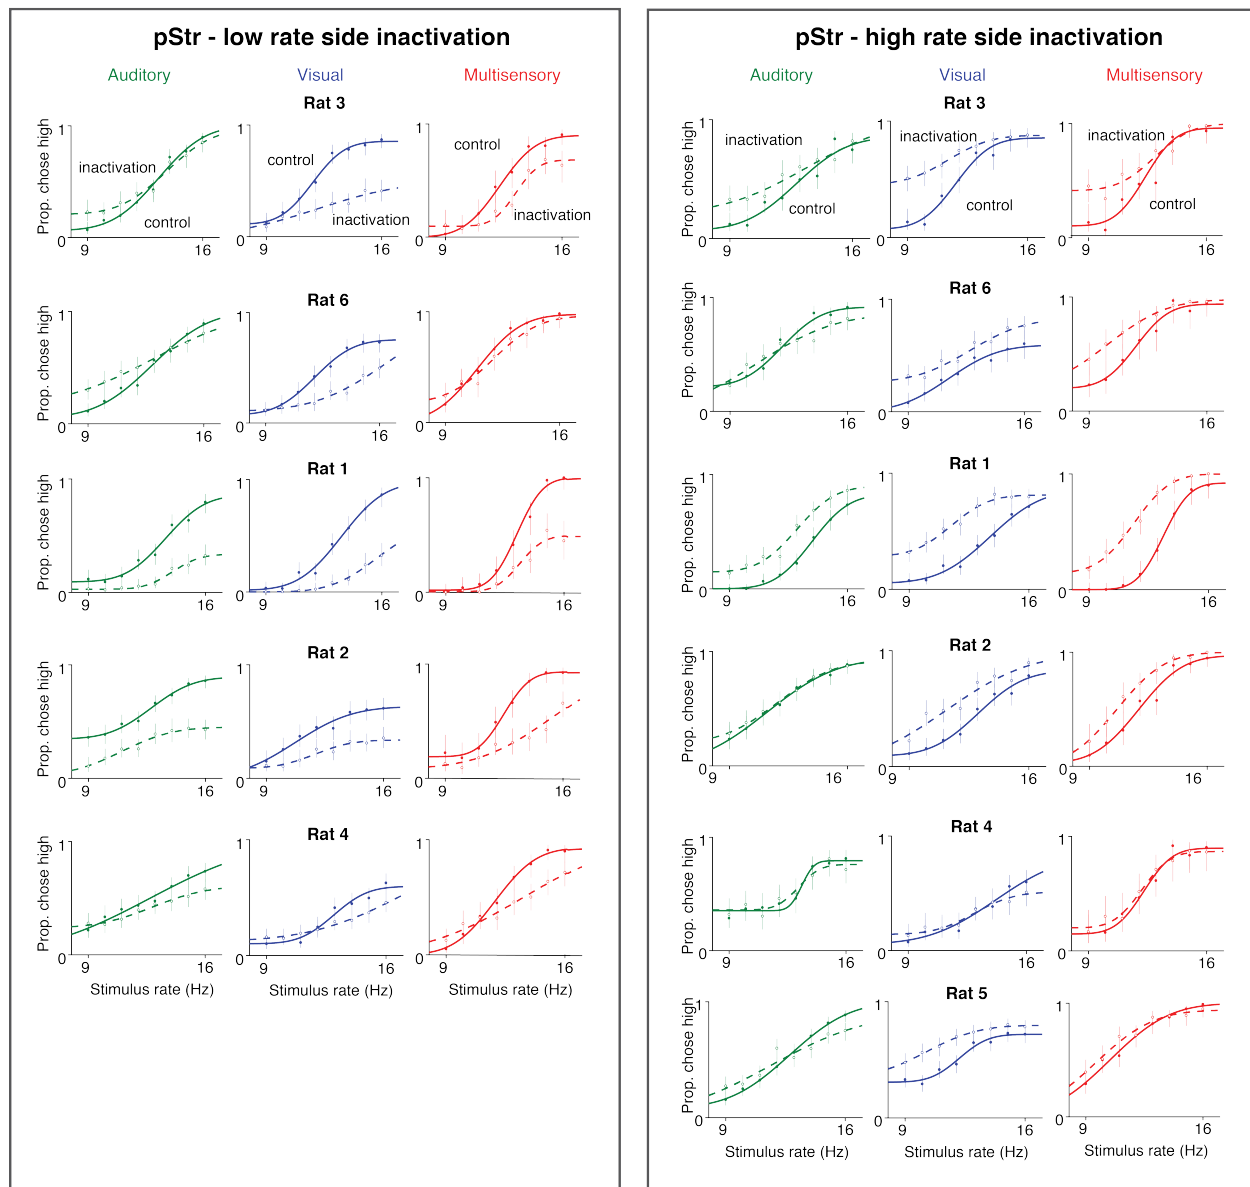

97

98 **Supplementary Figure 9: Single rat performance following pStr inactivation** Left: inactivation of the  
99 low-rate associated side. Rat shows increased lapses on high-rate trials on all sensory modalities. Right:  
100 inactivation of the high-rate associated side. Rat shows increased lapses on low-rate trials on all sensory  
101 modalities. Auditory (green), visual (blue) and multisensory (red).

Supplementary figure 10

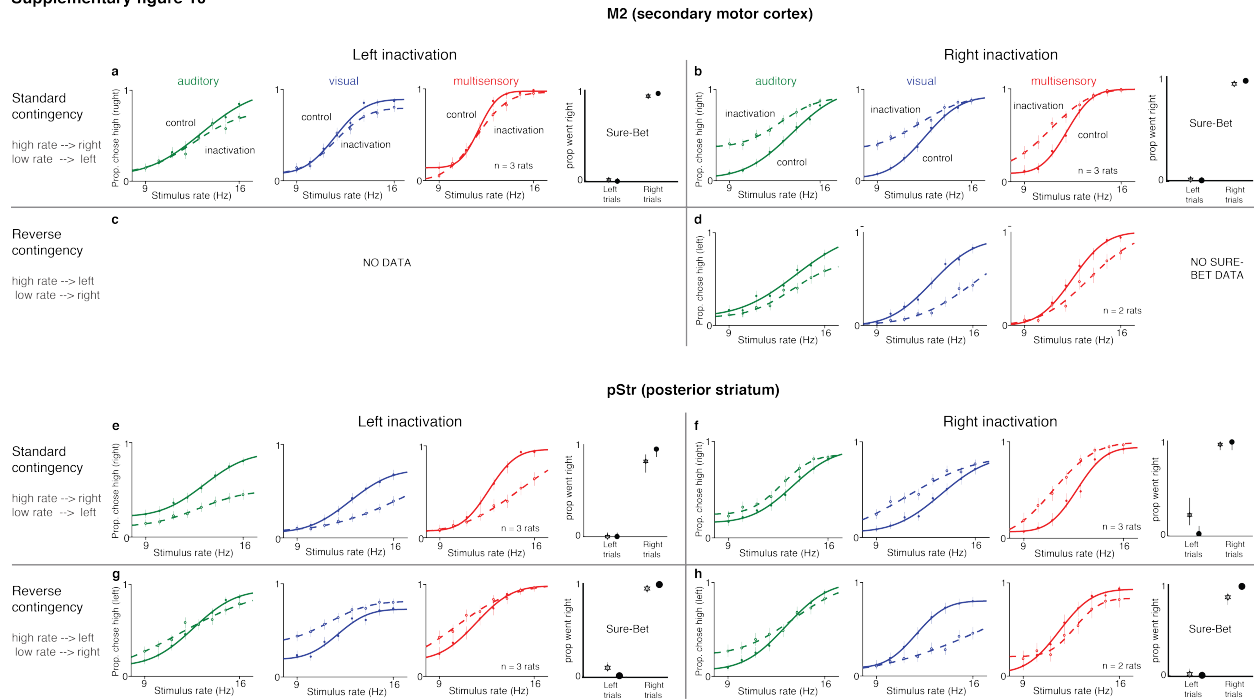

102

103 **Supplementary Figure 10: Unilateral inactivation of M2 or pStr biases performance ipsilaterally and**

104 **increases contralateral lapses** Performance of the same rats shown in Figure 5b depicted as a function of

105 the inactivated side (right or left) and the rate-contingency in which they were trained (standard or reverse).

106 Standard contingency: high rate = go right, low rate = go left; reverse contingency: high rate = go left, low

107 rate = go right. Each quadrant shows 4 plots: 3 psychometrics for rate discrimination trials and one for

108 performance on sure-bet trials. auditory (green), visual (blue) and multisensory (red). (a)-(d) M2 inactiva-

109 tion. (e)-(h) pStr inactivation. (a), (d) Rats trained on the standard contingency and inactivated on the left

110 hemisphere show increased lapses on the high rates (i.e., fewer rightward choices on high rates). No effect

111 on sure-bet trials. (b), (f) Rats trained on the standard contingency and inactivated on the right hemisphere

112 show increased lapses on the low rates (i.e., fewer leftward choices on low rates). No effect on sure-bet trials.

113 (c), (g) Rats trained on the reverse contingency and inactivated on the left hemisphere show increased lapses

114 on the low rates (i.e., fewer rightward choices on low rates). No effect on sure-bet trials. No data for this

115 condition for M2 inactivation. (d), (h) Rats trained on the reverse contingency and inactivated on the right  
 116 hemisphere show increased lapses on the high rates (i.e., fewer leftward choices on high rates). No effect on  
 117 sure-bet trials for pStr inactivated animals; no data for M2 inactivated animals.

118

### Supplementary figure 11

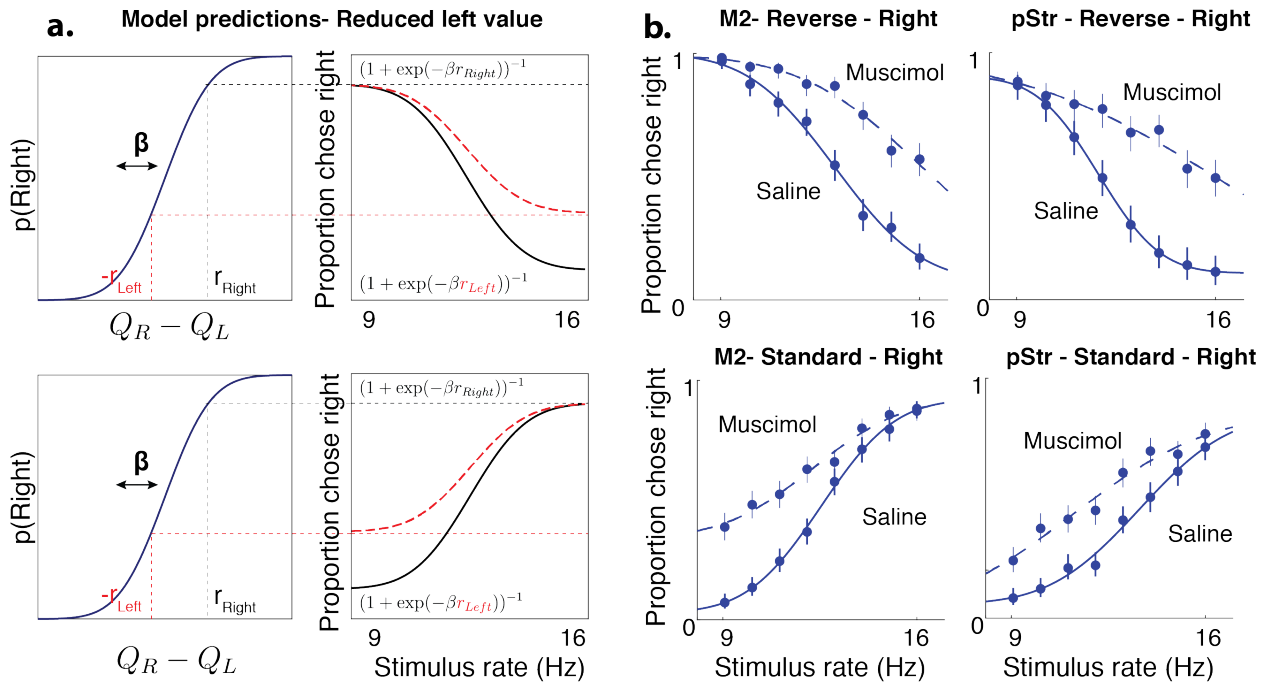

119

120 **Supplementary Figure 11: Inactivations devalue contralateral actions irrespective of associated stim-**  
 121 **ulus** (a) Model predictions for rightward inactivations on standard (top) and reversed (bottom) stimulus-  
 122 response contingencies - in both cases, the model predicts that reduced leftward action values should only af-  
 123 fect lapses on the side associated with leftward movements. (b) Inactivation data on visual trials from M2 (left)  
 124 or pStr (Right) shows a pattern of effects consistent with action value deficits, irrespective of the contingency.

## Supplementary figure 12

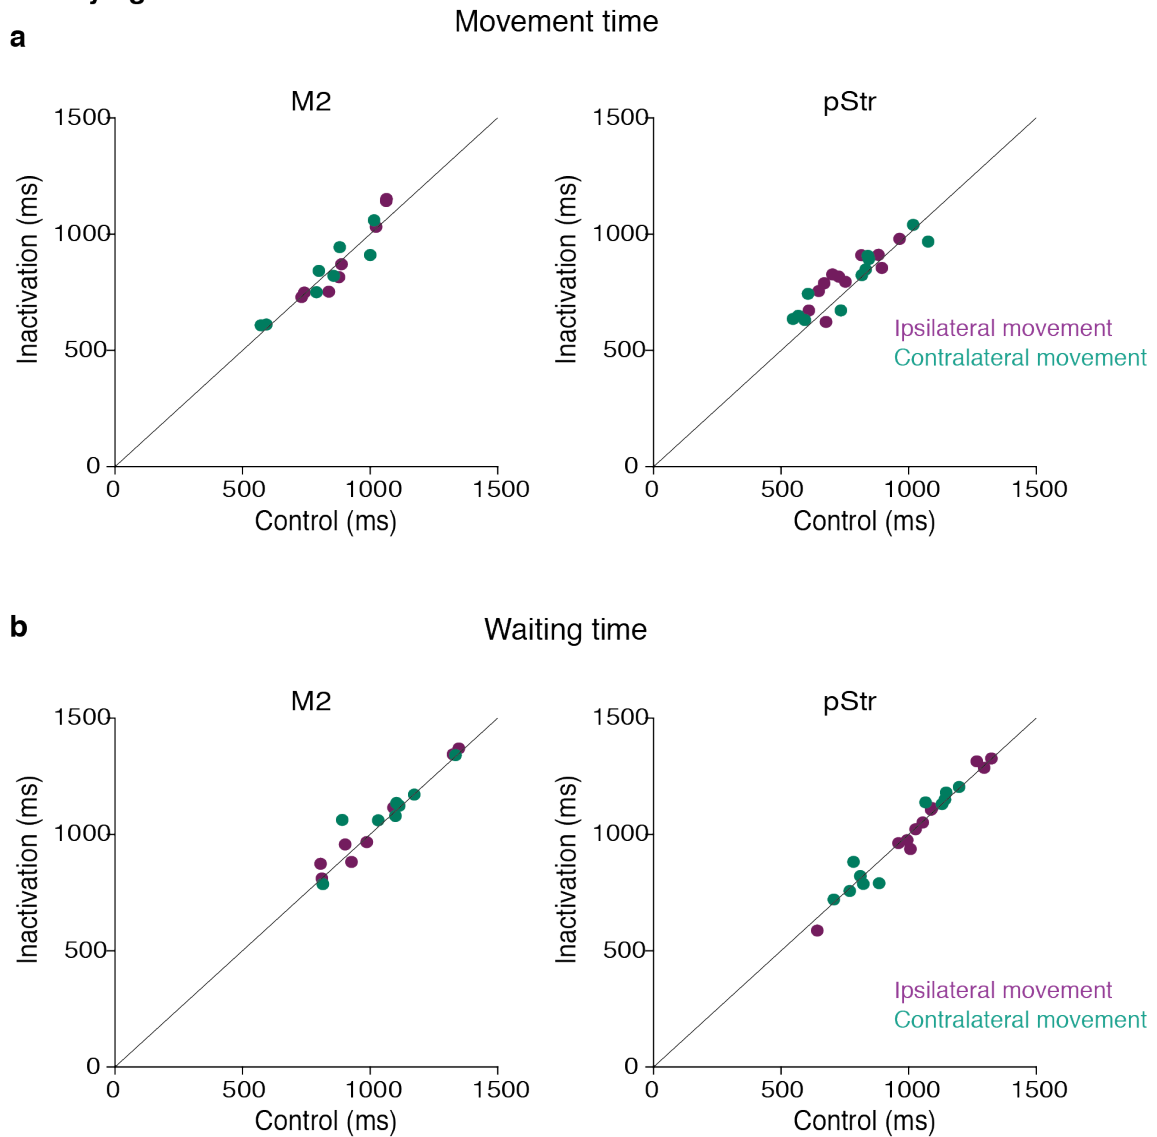

126 **Supplementary Figure 12: No significant effect on movement parameters following muscimol inacti-**  
127 **vation** (a) Mean movement times from the center port to the side ports were not significantly different  
128 following muscimol inactivation of M2 (left;  $p = 0.9554$  for contralateral,  $0.9852$  for ipsilateral movements;  
129  $n=5$  rats) or pStr (right;  $p = 0.6629$  for contra,  $p = 0.2615$  for ipsi,  $n=6$  rats). Control data on the abscissa  
130 is plotted against inactivation data on the ordinate. Purple, movement toward the side ipsilateral to the  
131 inactivation site; blue, movement toward the side contralateral to the inactivation site; Error bars (s.e.m.)

132 are not visible because they were obscured by the markers in all cases. (b) Mean wait times in the center  
133 port were not significantly different following muscimol inactivation of M2 (left;  $p = 0.7612$  for contra,  $p$   
134  $=0.8896$  for ipsi,  $n=5$  rats) or pStr (right;  $p = 0.9128$  for contra,  $p =0.9412$  for ipsi,  $n=6$  rats). All p-values  
135 were computed from paired t-tests. Error bars (s.e.m.) are not visible because they were obscured by the  
136 markers in all cases.

137

138
